# Supplementary material for: Knecorticosanones C–H from the fruits of Knema globularia (Lam.) warb
Source: Royal Society of Chemistry journal article supplement (doi:10.1039/d0ra10498a), 2021-01-01
Supplement: d0ra10498a1.pdf [file d0ra10498a1.pdf]

## ***Supporting Information***

### **Knecorticosanones C-H from the fruits of *Knema globularia* (Lam.) Warb.**

Chindawadee Chuenban,<sup>a</sup> Aonnicha Sombatsri,<sup>a</sup> Thurdpong Sribuhom,<sup>a</sup> Chanakan Pornchoo,<sup>b</sup>

Auemduan Prawan,<sup>b</sup> Sarawut Tontapha,<sup>c</sup> Vittaya Amornkitbamrung,<sup>c</sup> Chavi Yenjai\*<sup>a</sup>

<sup>a</sup>Natural Products Research Unit, Department of Chemistry and Center of Excellence for Innovation in Chemistry, Faculty of Science, Khon Kaen University, Khon Kaen 40002, Thailand

<sup>b</sup>Department of Pharmacology, Faculty of Medicine, Khon Kaen University, Khon Kaen 40002, Thailand

<sup>c</sup>Integrated Nanotechnology Research Centre, Department of Physics, Faculty of Science, Khon Kaen University, Khon Kaen 40002, Thailand

\* Corresponding author: E-mail: [chayen@kku.ac.th](mailto:chayen@kku.ac.th) Tel.+66-4320-2222-41 ext 12243

## Table of Content

|                                                                      | page |
|----------------------------------------------------------------------|------|
| <b>Figure S1</b> $^1\text{H}$ -NMR spectrum of compound <b>1</b>     | 4    |
| <b>Figure S2</b> $^{13}\text{C}$ -NMR spectrum of compound <b>1</b>  | 4    |
| <b>Figure S3</b> DEPT spectrum of compound <b>1</b>                  | 5    |
| <b>Figure S4</b> HMQC spectrum of compound <b>1</b>                  | 5    |
| <b>Figure S5</b> HMBC spectrum of compound <b>1</b>                  | 6    |
| <b>Figure S6</b> COSY spectrum of compound <b>1</b>                  | 6    |
| <b>Figure S7</b> NOESY spectrum of compound <b>1</b>                 | 7    |
| <b>Figure S8</b> Mass spectrum of compound <b>1</b>                  | 7    |
| <b>Figure S9</b> IR spectrum of compound <b>1</b>                    | 8    |
| <b>Figure S10</b> ECD spectrum of compound <b>1</b>                  | 8    |
| <b>Figure S11</b> $^1\text{H}$ -NMR spectrum of compound <b>2</b>    | 9    |
| <b>Figure S12</b> $^{13}\text{C}$ -NMR spectrum of compound <b>2</b> | 9    |
| <b>Figure S13</b> DEPT spectrum of compound <b>2</b>                 | 10   |
| <b>Figure S14</b> HMQC spectrum of compound <b>2</b>                 | 10   |
| <b>Figure S15</b> HMBC spectrum of compound <b>2</b>                 | 11   |
| <b>Figure S16</b> COSY spectrum of compound <b>2</b>                 | 11   |
| <b>Figure S17</b> NOESY spectrum of compound <b>2</b>                | 12   |
| <b>Figure S18</b> Mass spectrum of compound <b>2</b>                 | 12   |
| <b>Figure S19</b> IR spectrum of compound <b>2</b>                   | 13   |
| <b>Figure S20</b> ECD spectrum of compound <b>2</b>                  | 13   |
| <b>Figure S21</b> $^1\text{H}$ -NMR spectrum of compound <b>3</b>    | 14   |
| <b>Figure S22</b> $^{13}\text{C}$ -NMR spectrum of compound <b>3</b> | 14   |
| <b>Figure S23</b> DEPT spectrum of compound <b>3</b>                 | 15   |
| <b>Figure S24</b> HMQC spectrum of compound <b>3</b>                 | 15   |
| <b>Figure S25</b> HMBC spectrum of compound <b>3</b>                 | 16   |
| <b>Figure S26</b> COSY spectrum of compound <b>3</b>                 | 16   |
| <b>Figure S27</b> NOESY spectrum of compound <b>3</b>                | 17   |
| <b>Figure S28</b> Mass spectrum of compound <b>3</b>                 | 17   |
| <b>Figure S29</b> IR spectrum of compound <b>3</b>                   | 18   |
| <b>Figure S30</b> ECD spectrum of compound <b>3</b>                  | 18   |
| <b>Figure S31</b> $^1\text{H}$ -NMR spectrum of compound <b>4</b>    | 19   |
| <b>Figure S32</b> $^{13}\text{C}$ -NMR spectrum of compound <b>4</b> | 19   |
| <b>Figure S33</b> DEPT spectrum of compound <b>4</b>                 | 20   |
| <b>Figure S34</b> HMQC spectrum of compound <b>4</b>                 | 20   |
| <b>Figure S35</b> HMBC spectrum of compound <b>4</b>                 | 21   |
| <b>Figure S36</b> COSY spectrum of compound <b>4</b>                 | 21   |
| <b>Figure S37</b> NOESY spectrum of compound <b>4</b>                | 22   |

## Table of Content (cont.)

|                                                                      | Page |
|----------------------------------------------------------------------|------|
| <b>Figure S38</b> Mass spectrum of compound <b>4</b>                 | 22   |
| <b>Figure S39</b> IR spectrum of compound <b>4</b>                   | 23   |
| <b>Figure S40</b> ECD spectrum of compound <b>4</b>                  | 23   |
| <b>Figure S41</b> $^1\text{H}$ -NMR spectrum of compound <b>5</b>    | 24   |
| <b>Figure S42</b> $^{13}\text{C}$ -NMR spectrum of compound <b>5</b> | 24   |
| <b>Figure S43</b> DEPT spectrum of compound <b>5</b>                 | 25   |
| <b>Figure S44</b> HMQC spectrum of compound <b>5</b>                 | 25   |
| <b>Figure S45</b> HMBC spectrum of compound <b>5</b>                 | 26   |
| <b>Figure S46</b> COSY spectrum of compound <b>5</b>                 | 26   |
| <b>Figure S47</b> NOESY spectrum of compound <b>5</b>                | 27   |
| <b>Figure S48</b> Mass spectrum of compound <b>5</b>                 | 27   |
| <b>Figure S49</b> IR spectrum of compound <b>5</b>                   | 28   |
| <b>Figure S50</b> $^1\text{H}$ -NMR spectrum of compound <b>6</b>    | 28   |
| <b>Figure S51</b> $^{13}\text{C}$ -NMR spectrum of compound <b>6</b> | 29   |
| <b>Figure S52</b> DEPT spectrum of compound <b>6</b>                 | 29   |
| <b>Figure S53</b> HMQC spectrum of compound <b>6</b>                 | 30   |
| <b>Figure S54</b> HMBC spectrum of compound <b>6</b>                 | 30   |
| <b>Figure S55</b> COSY spectrum of compound <b>6</b>                 | 31   |
| <b>Figure S56</b> NOESY spectrum of compound <b>6</b>                | 31   |
| <b>Figure S57</b> Mass spectrum of compound <b>6</b>                 | 32   |
| <b>Figure S58</b> IR spectrum of compound <b>6</b>                   | 32   |

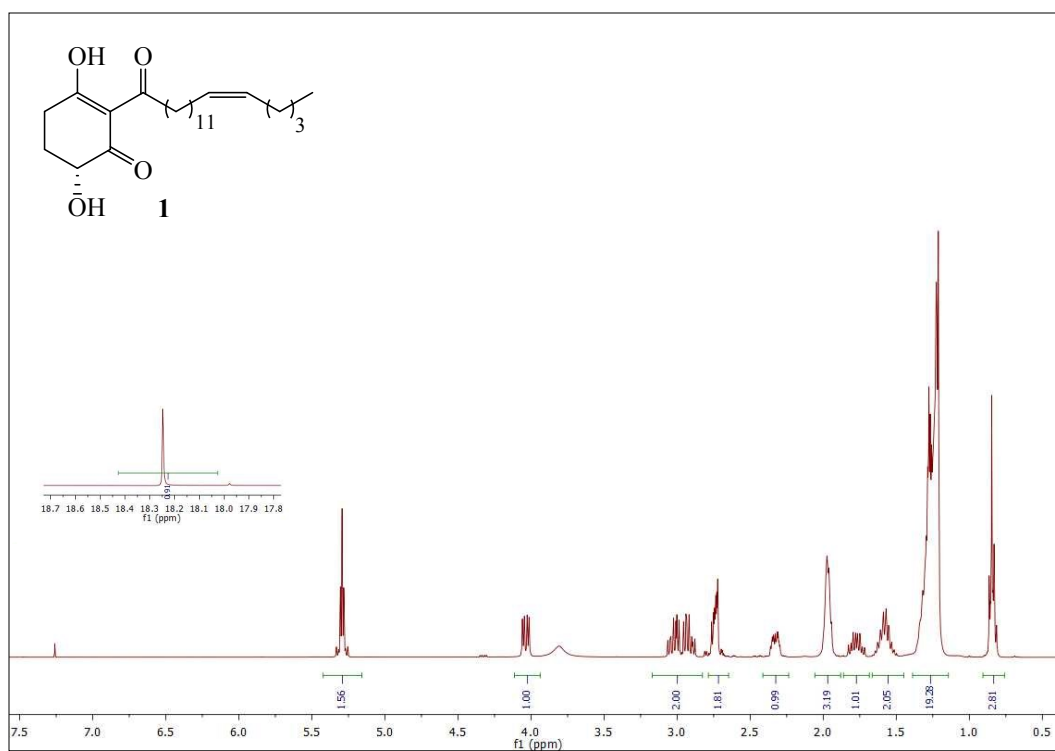

**Figure S1** <sup>1</sup>H-NMR spectrum of compound **1**

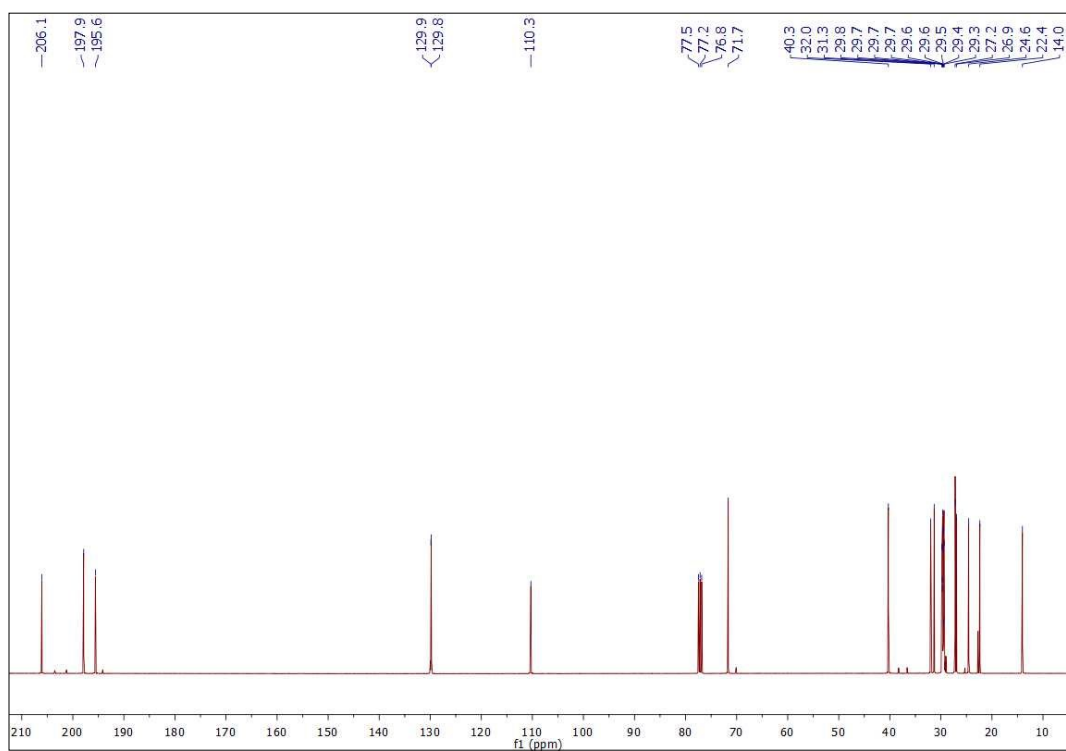

**Figure S2** <sup>13</sup>C-NMR spectrum of compound **1**

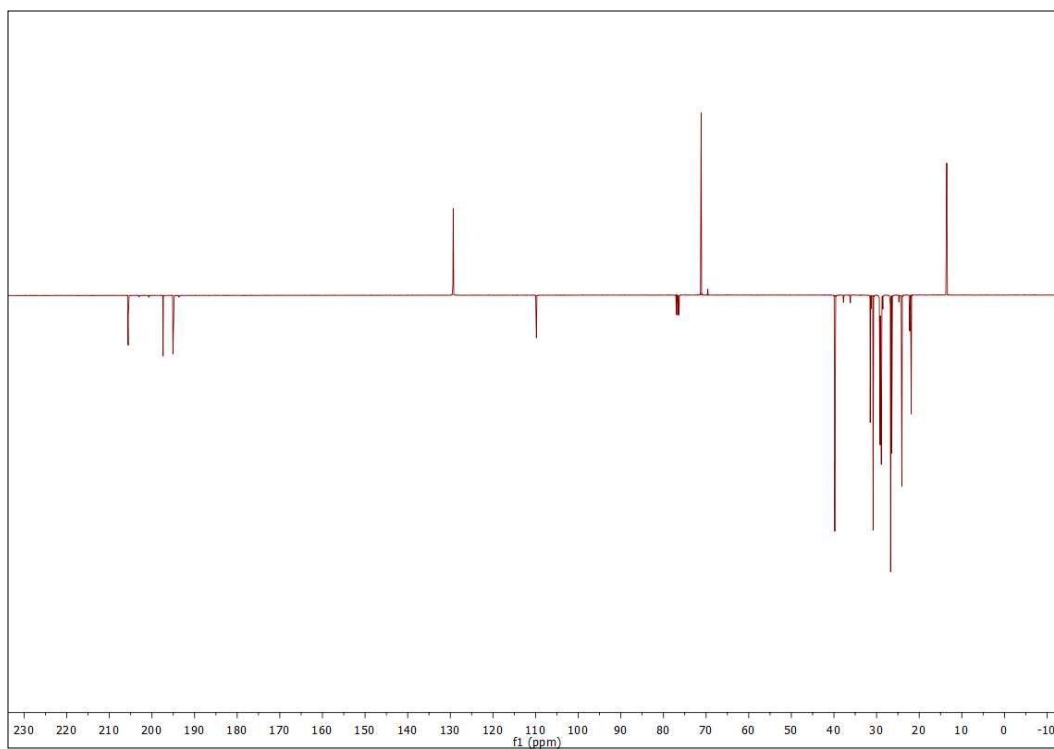

**Figure S3** DEPT spectrum of compound **1**

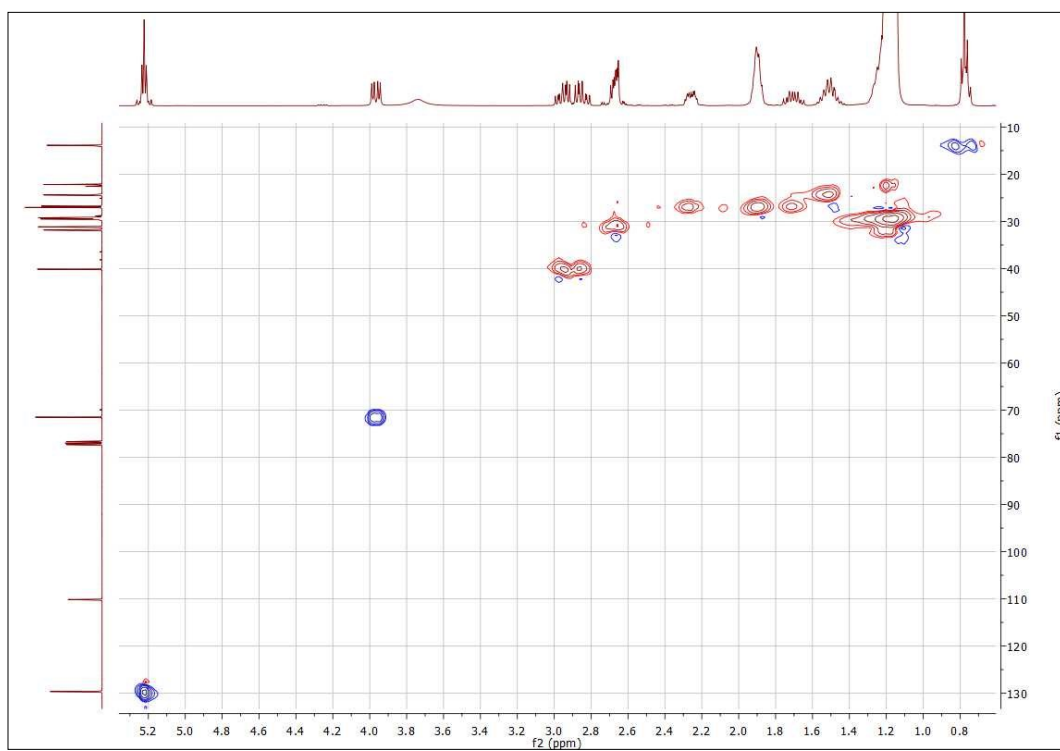

**Figure S4** HMQC spectrum of compound **1**

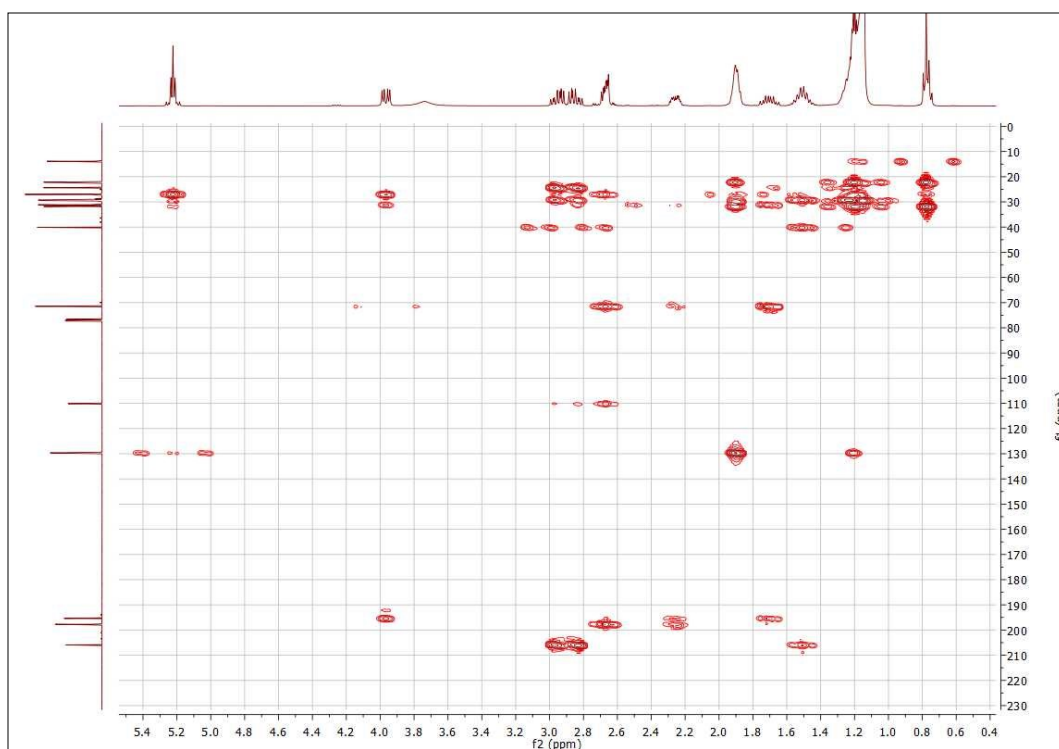

**Figure S5** HMBC spectrum of compound **1**

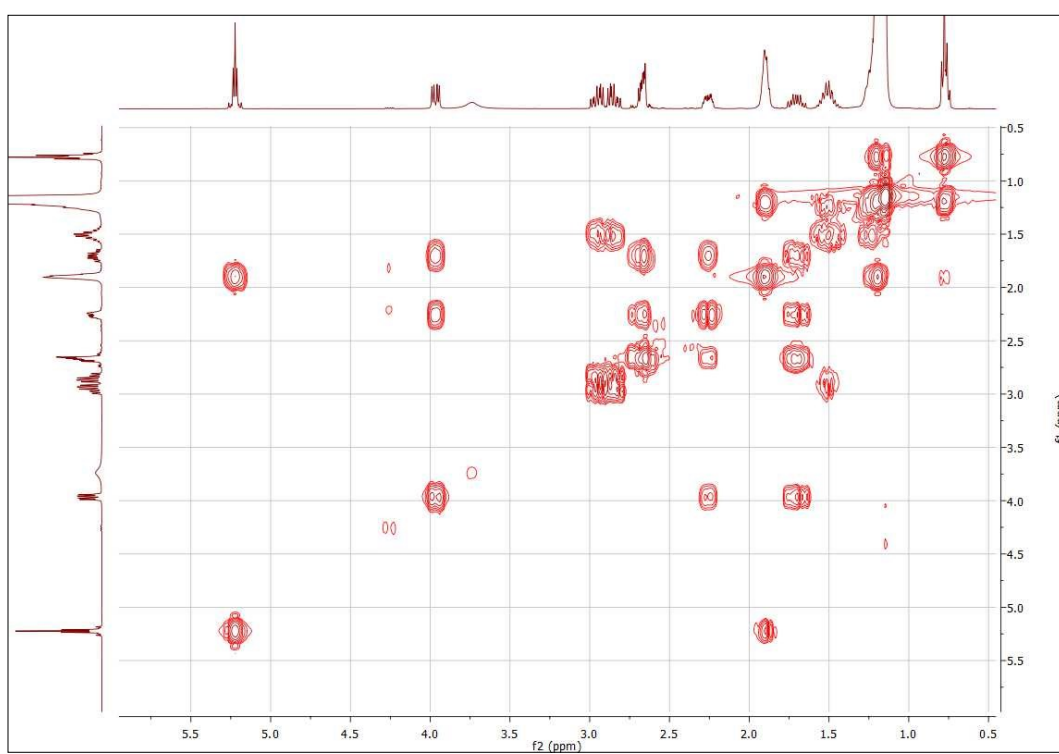

**Figure S6** COSY spectrum of compound **1**

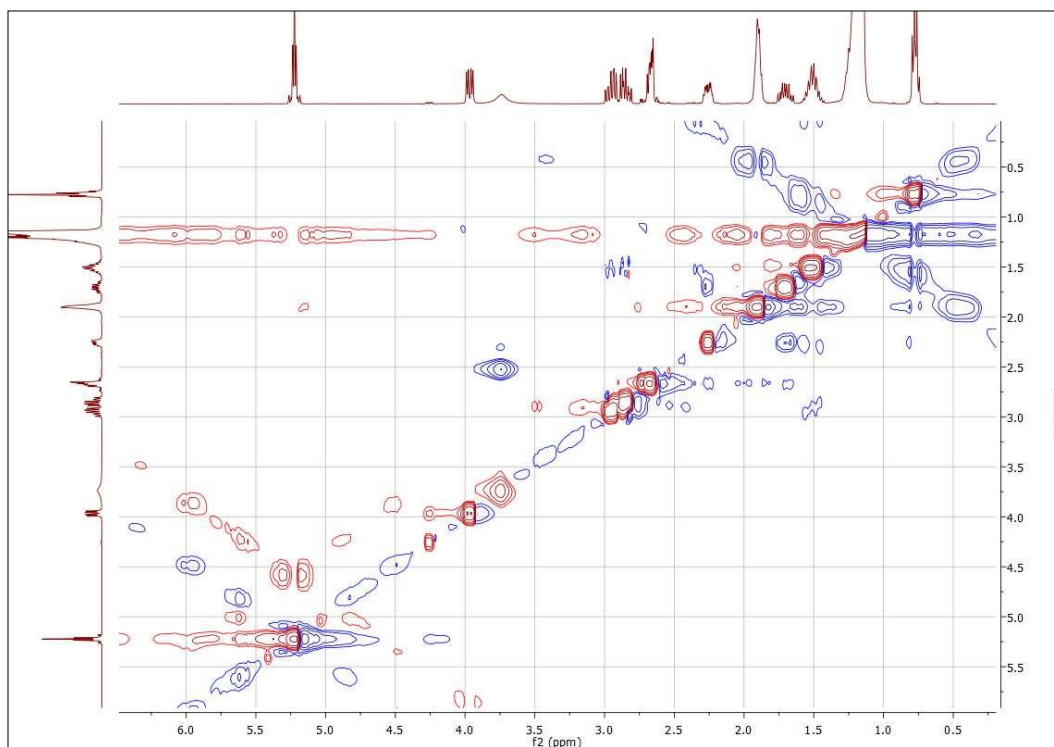

**Figure S7** NOESY spectrum of compound **1**

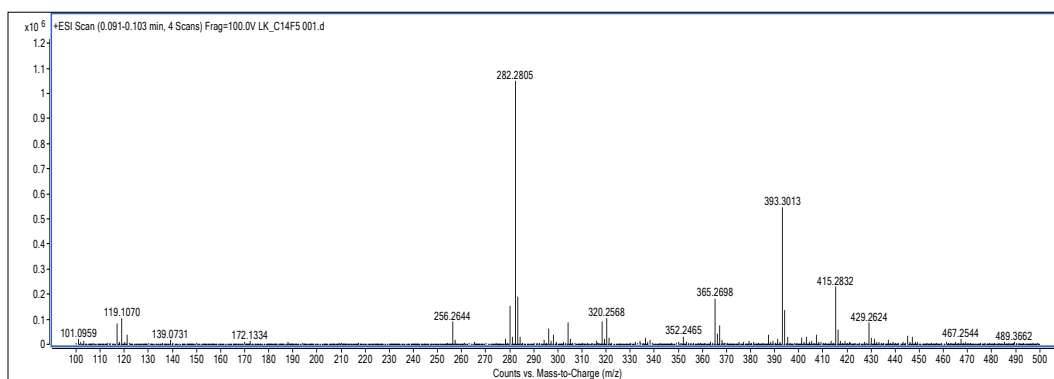

**Figure S8** Mass spectrum of compound **1**

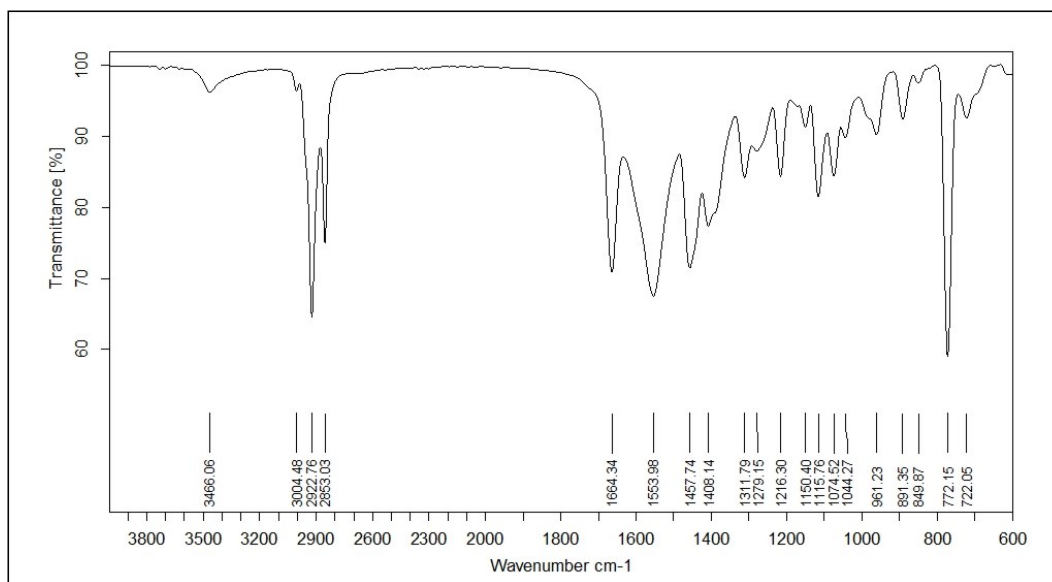

Figure S9 IR spectrum of compound 1

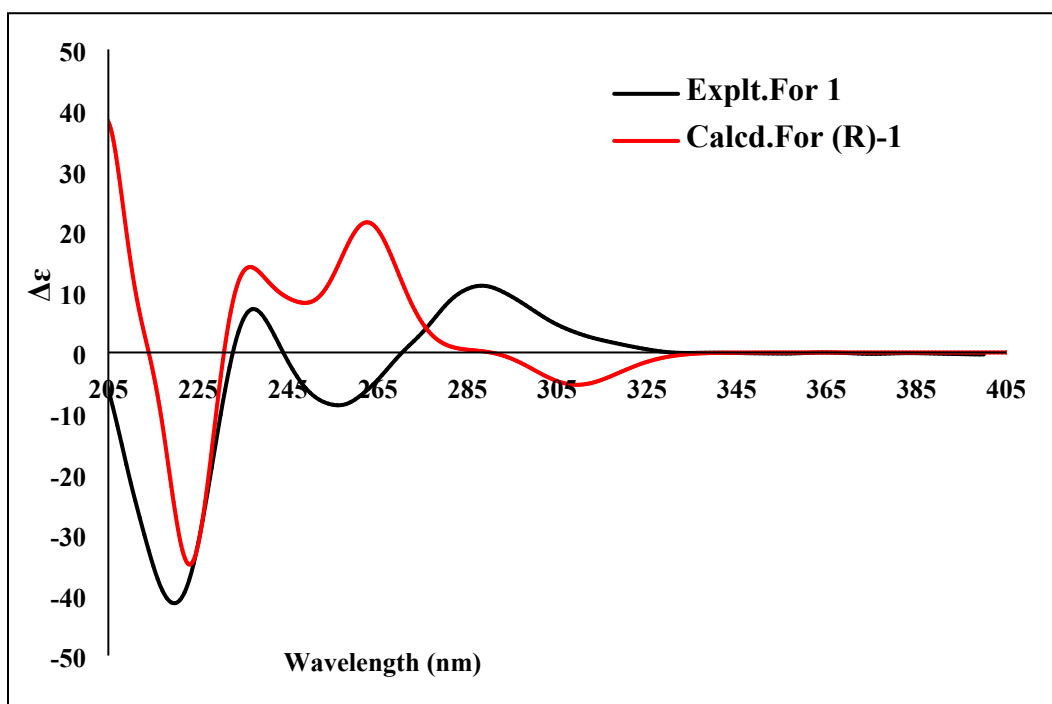

Figure S10 ECD spectrum of compound 1

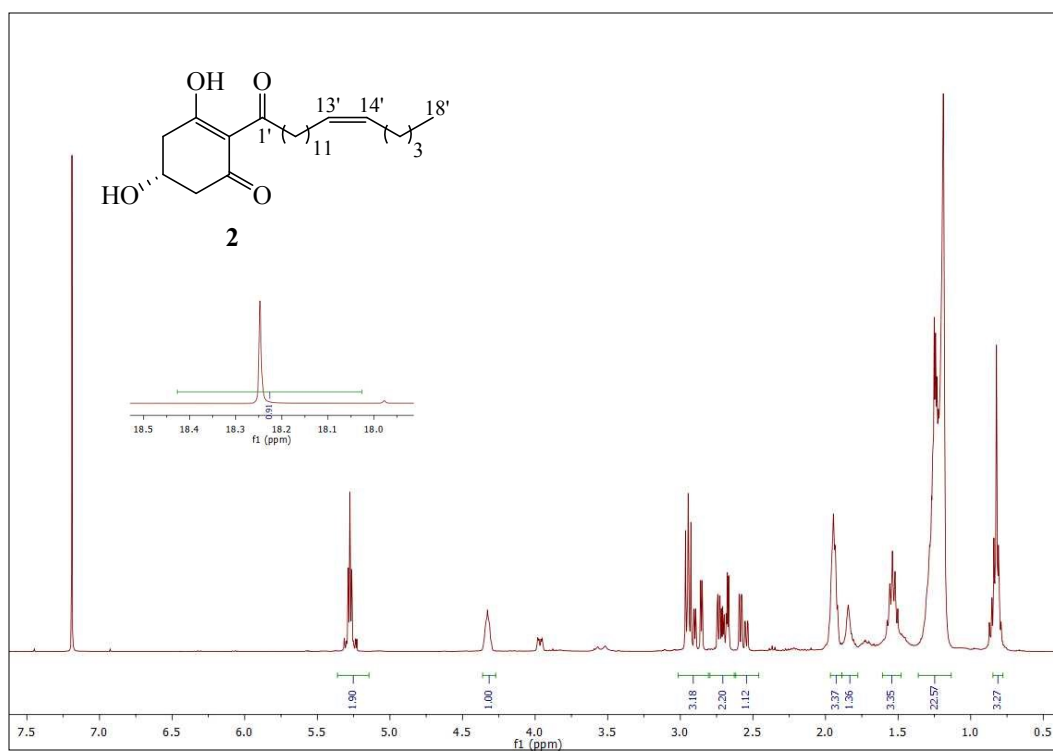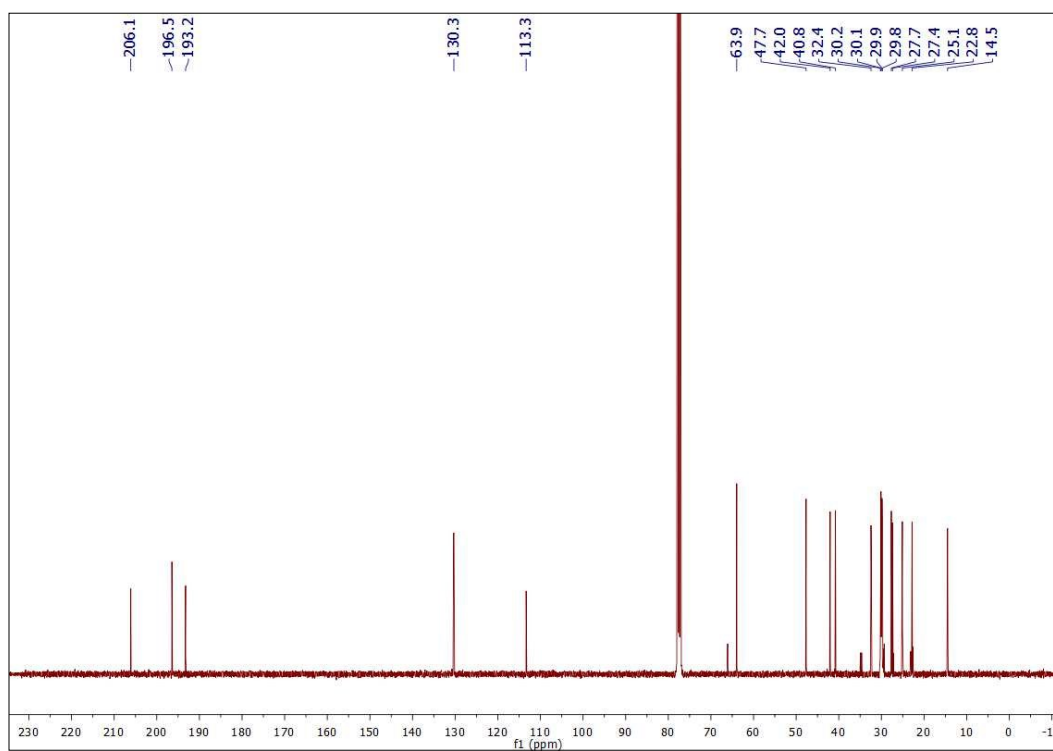

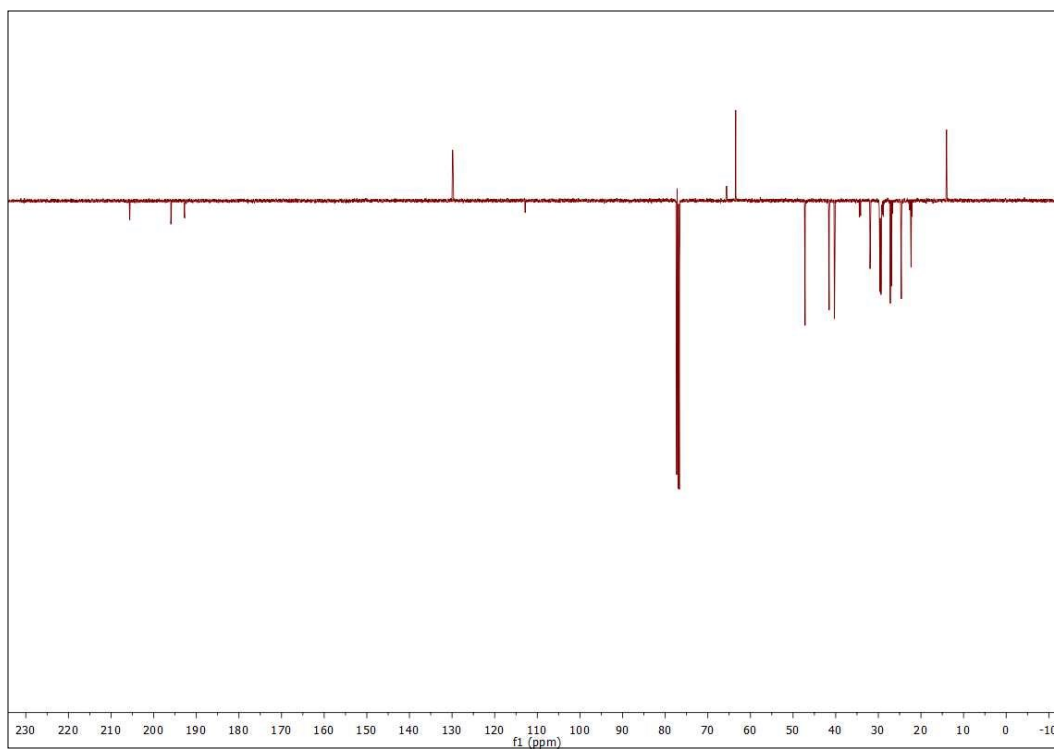

**Figure S13** DEPT spectrum of compound **2**

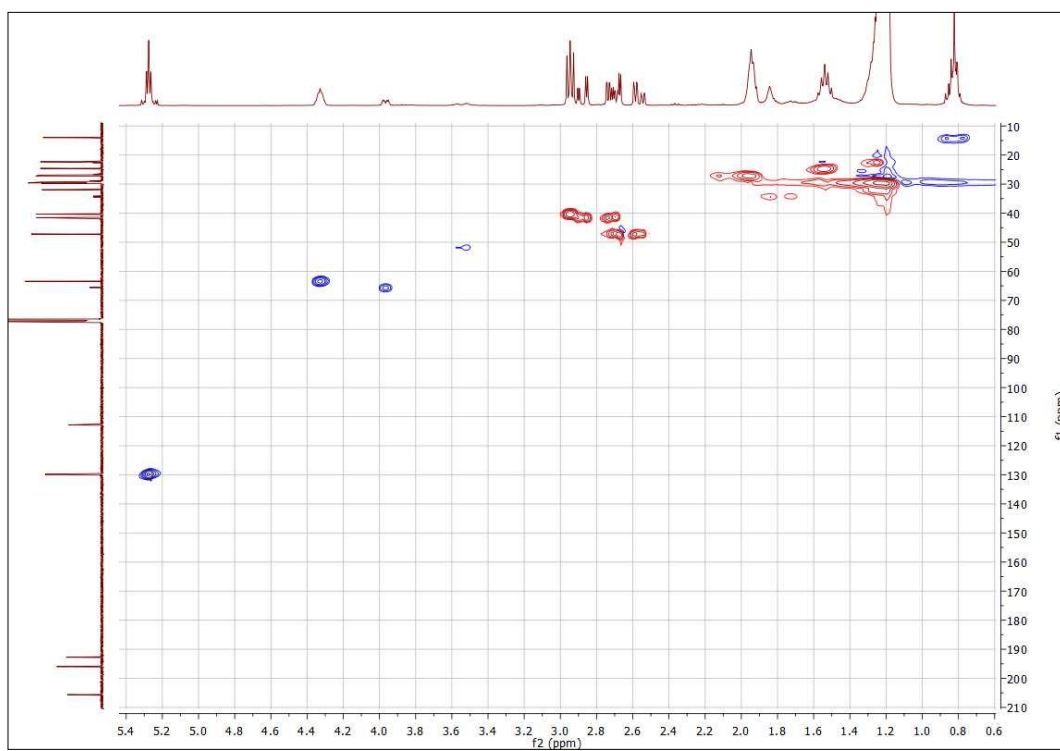

**Figure S14** HMQC spectrum of compound **2**

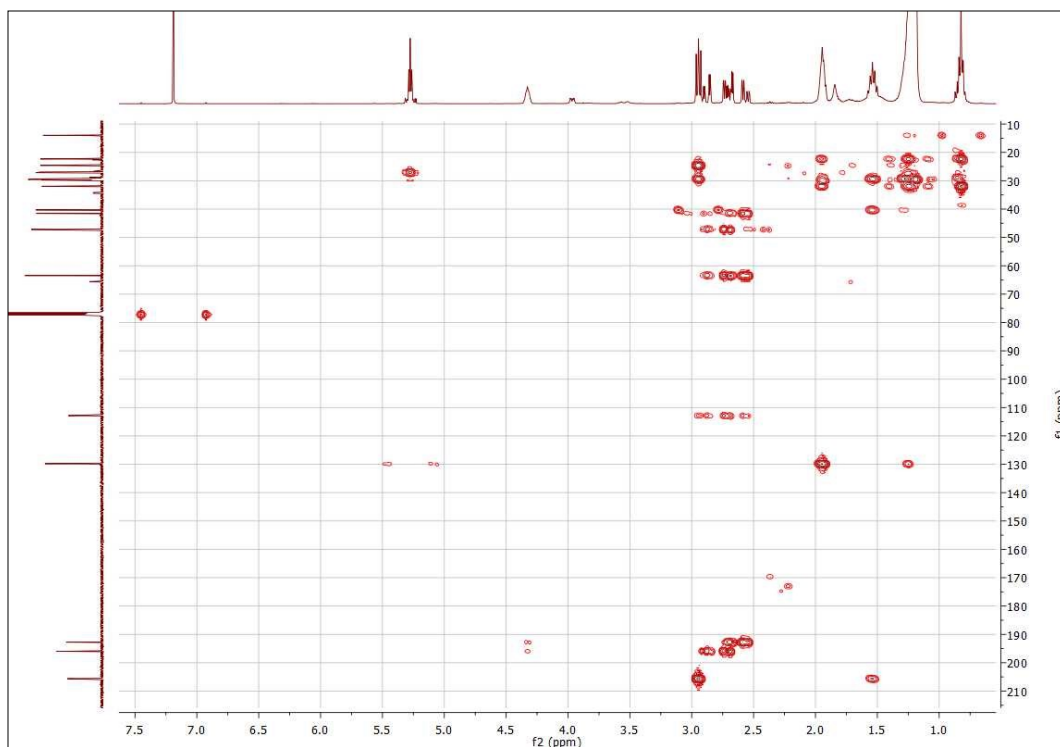

**Figure S15** HMBC spectrum of compound **2**

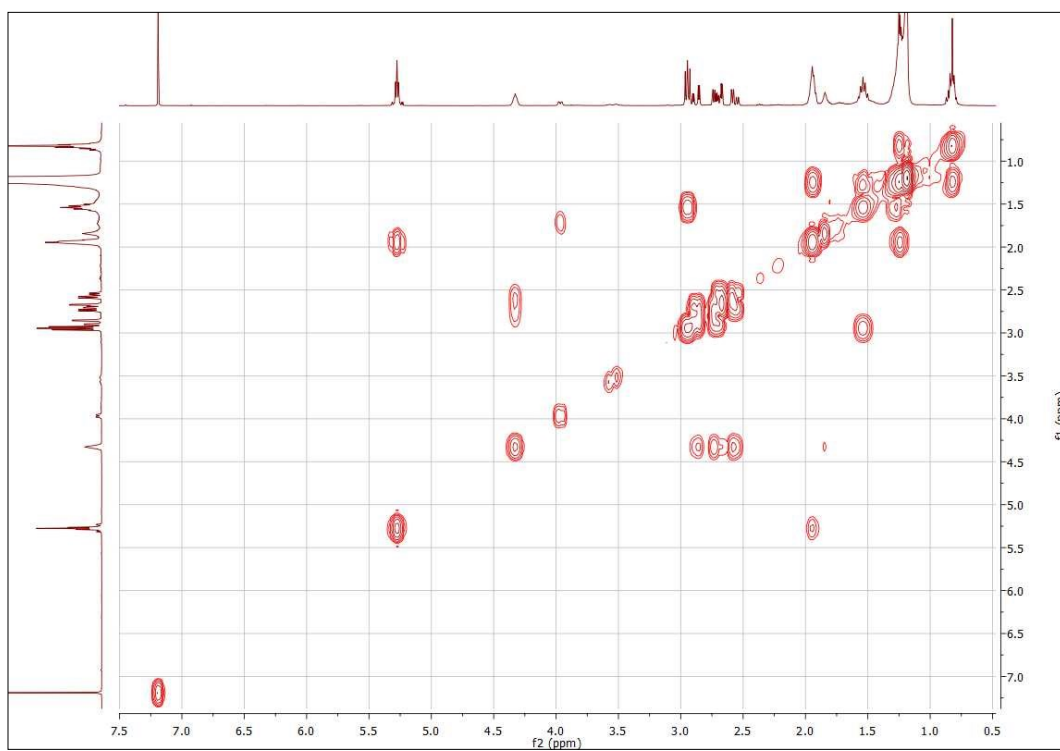

**Figure S16** COSY spectrum of compound **2**

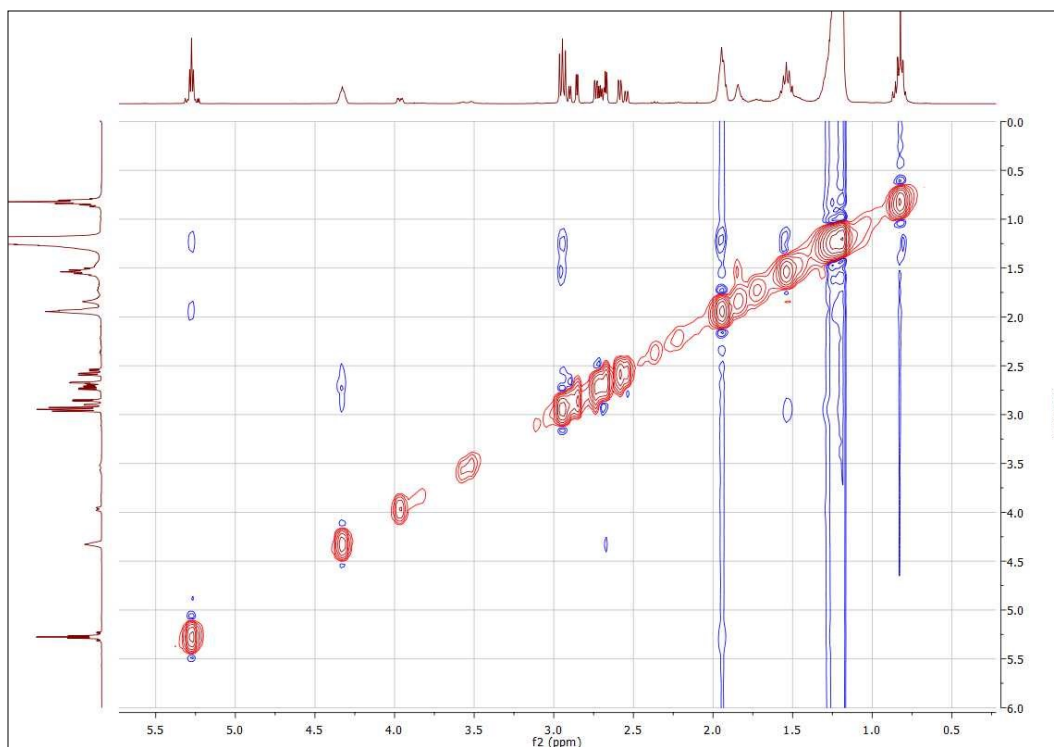

**Figure S17** NOESY spectrum of compound **2**

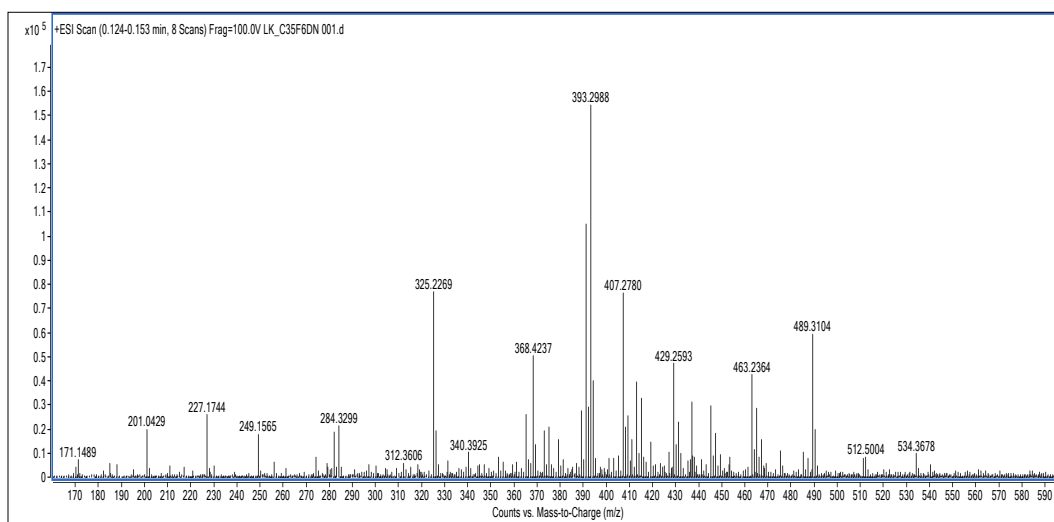

**Figure S18** Mass spectrum of compound **2**

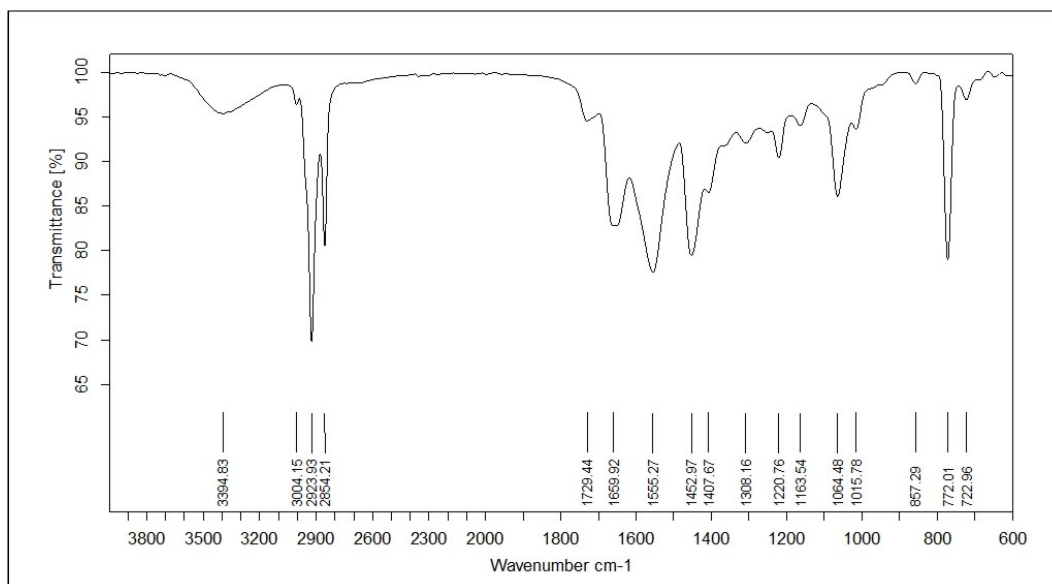

**Figure S19** IR spectrum of compound **2**

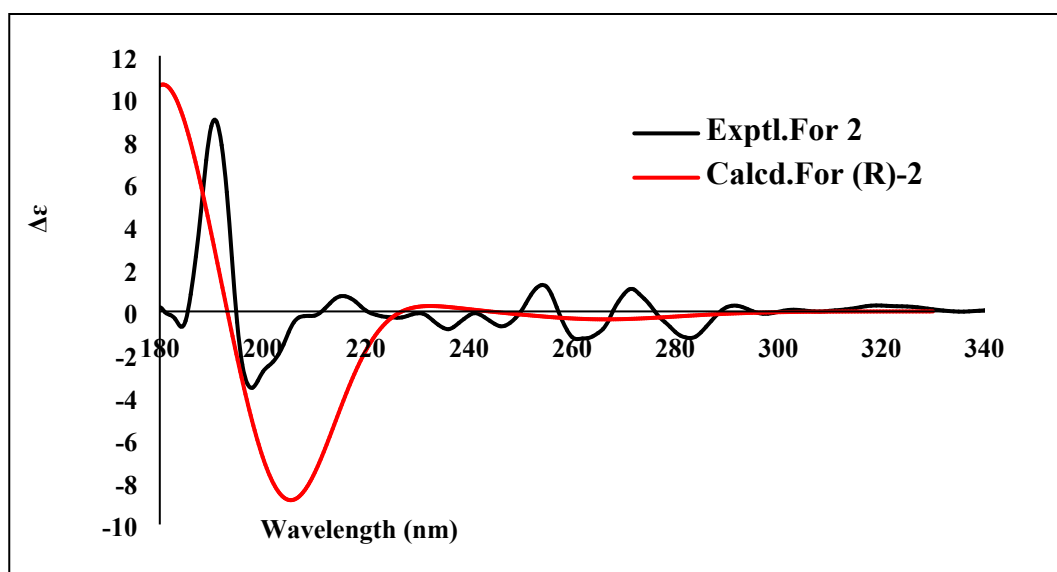

**Figure S20** ECD spectrum of compound **2**

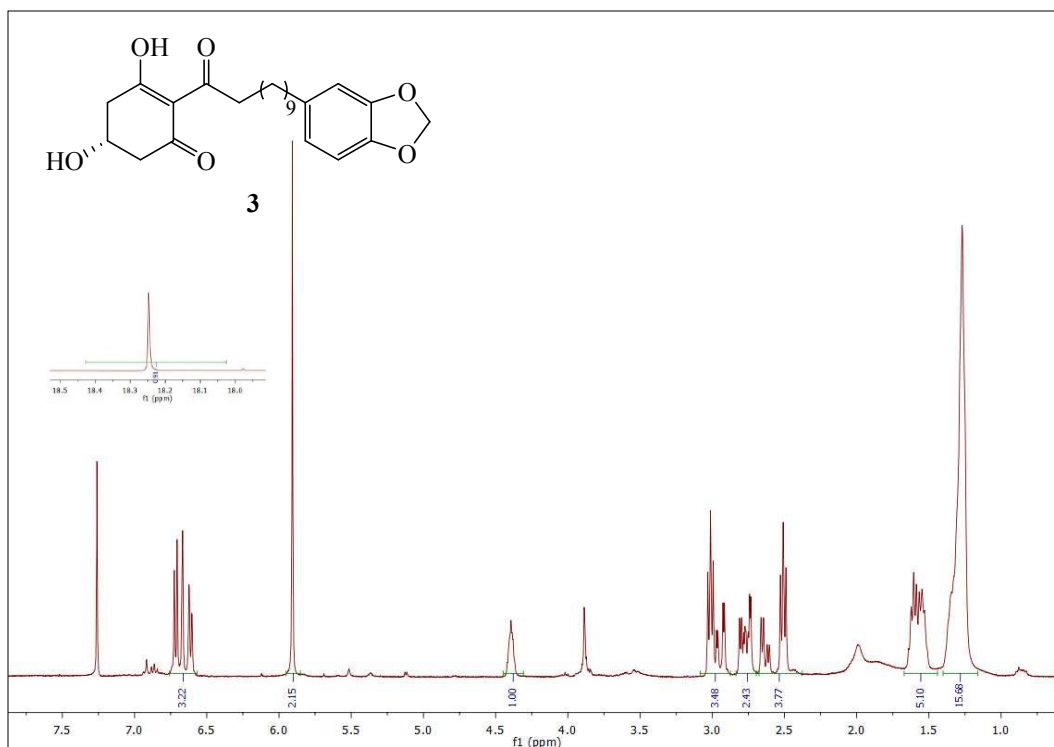

**Figure S21**  $^1\text{H}$ -NMR spectrum of compound **3**

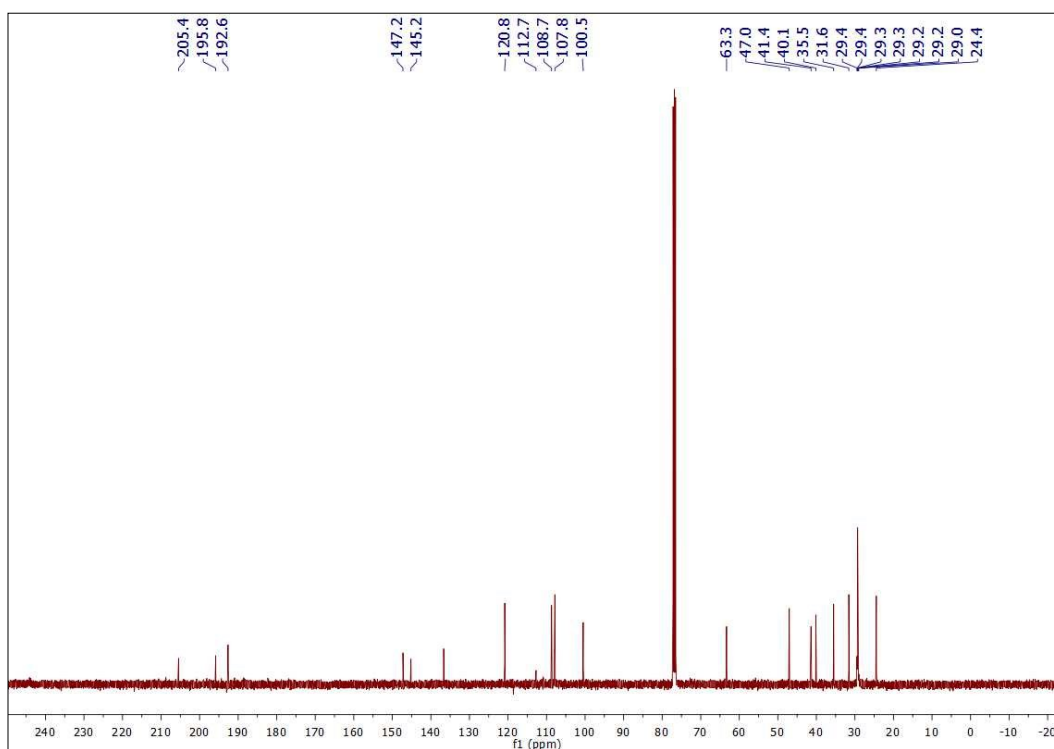

**Figure S22**  $^{13}\text{C}$ -NMR spectrum of compound **3**

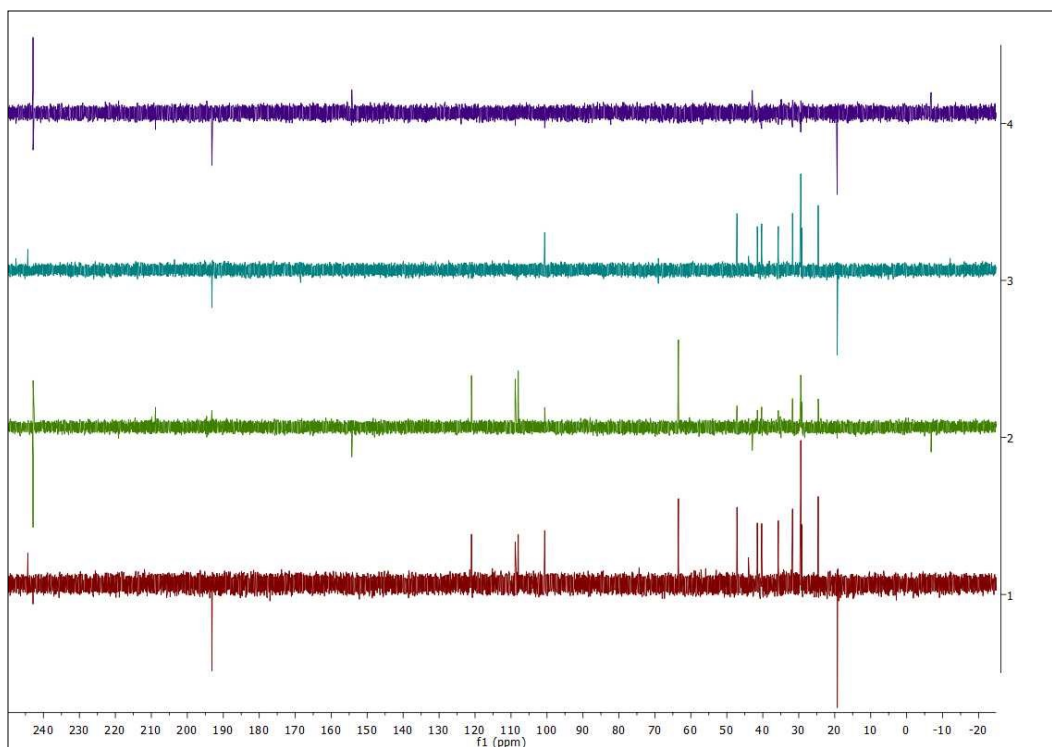

**Figure S23** DEPT spectrum of compound **3**

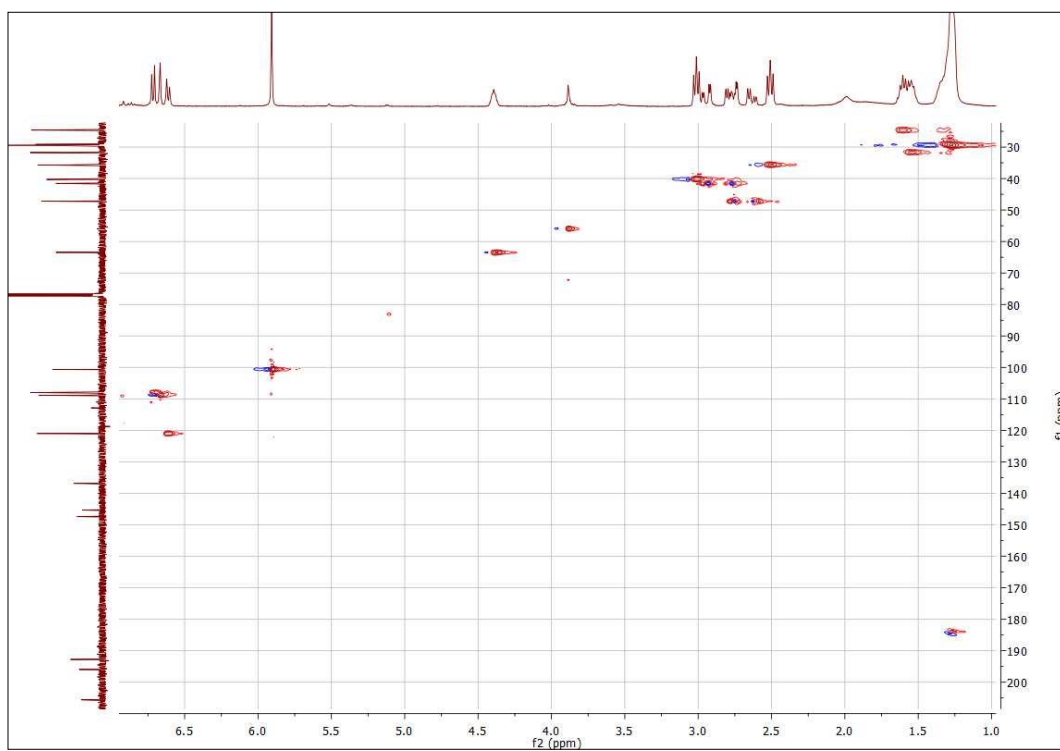

**Figure S24** HMQC spectrum of compound **3**

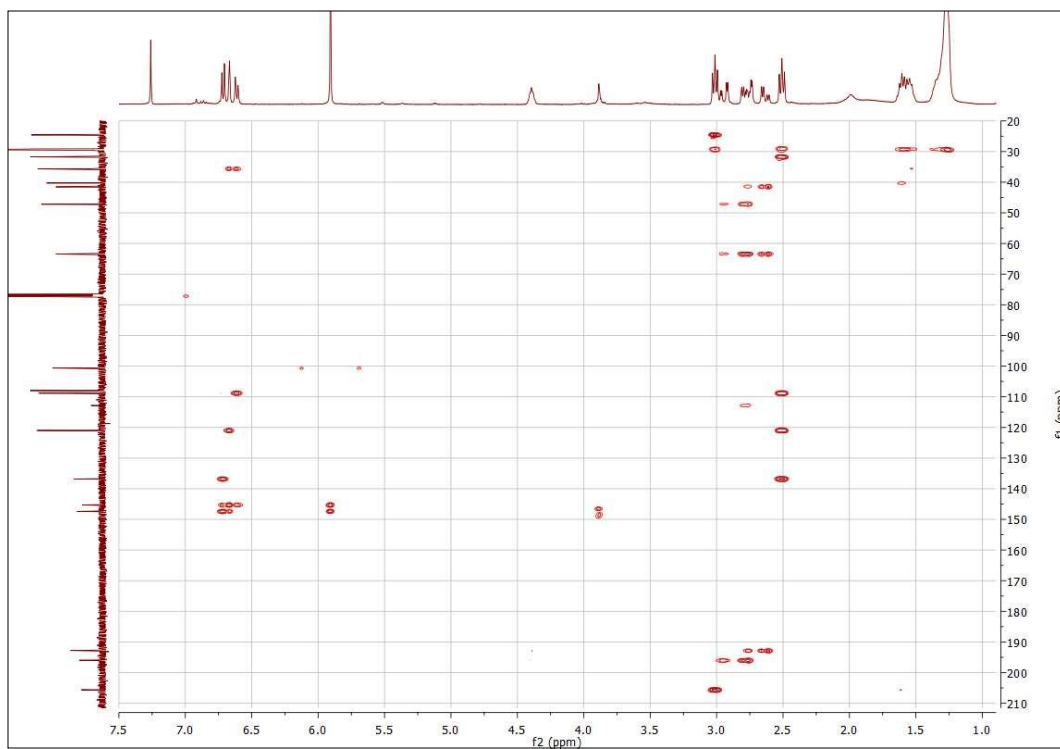

**Figure S25** HMBC spectrum of compound **3**

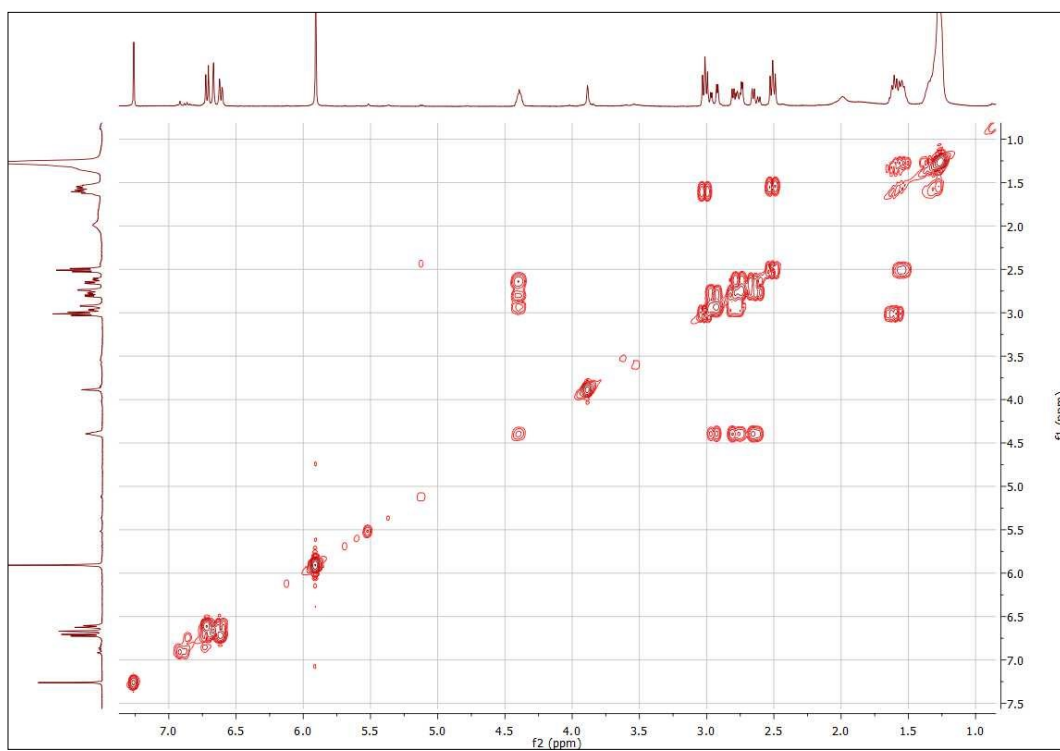

**Figure S26** COSY spectrum of compound **3**

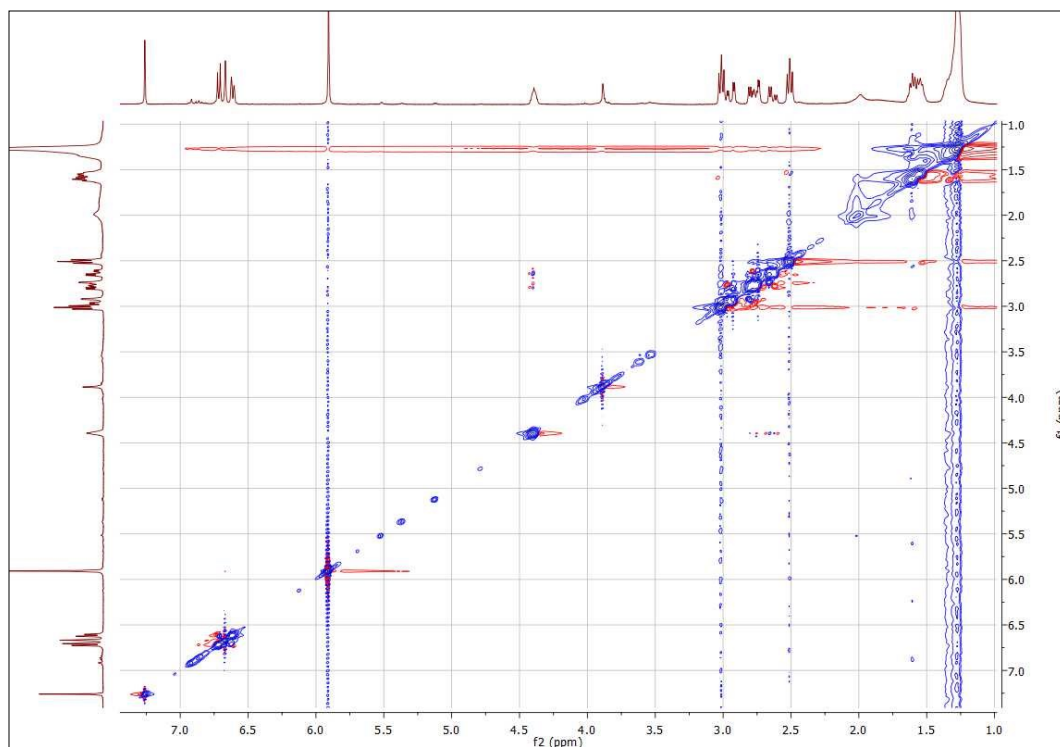

**Figure S27** NOESY spectrum of compound **3**

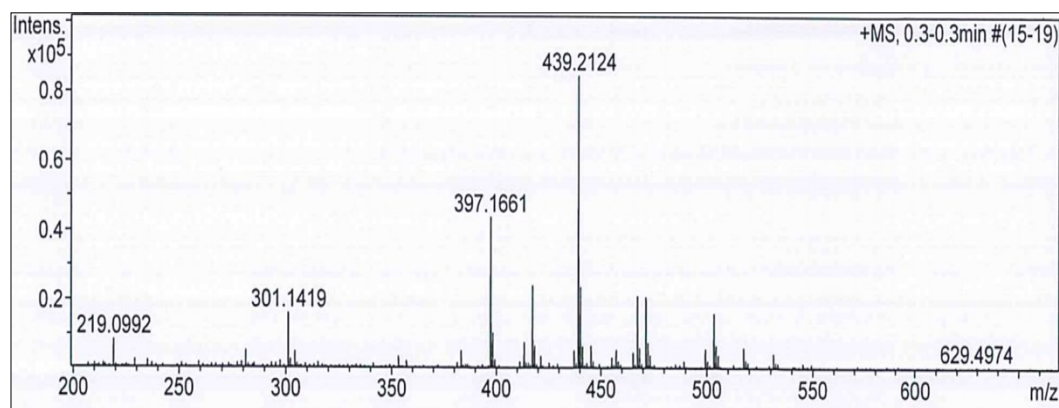

**Figure S28** Mass spectrum of compound **3**

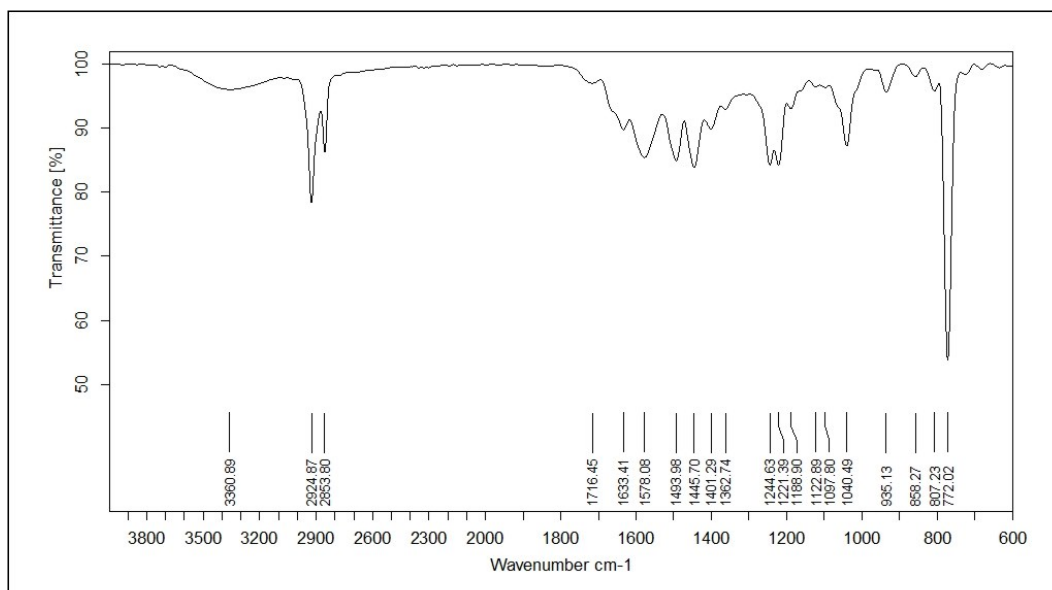

**Figure S29** IR spectrum of compound **3**

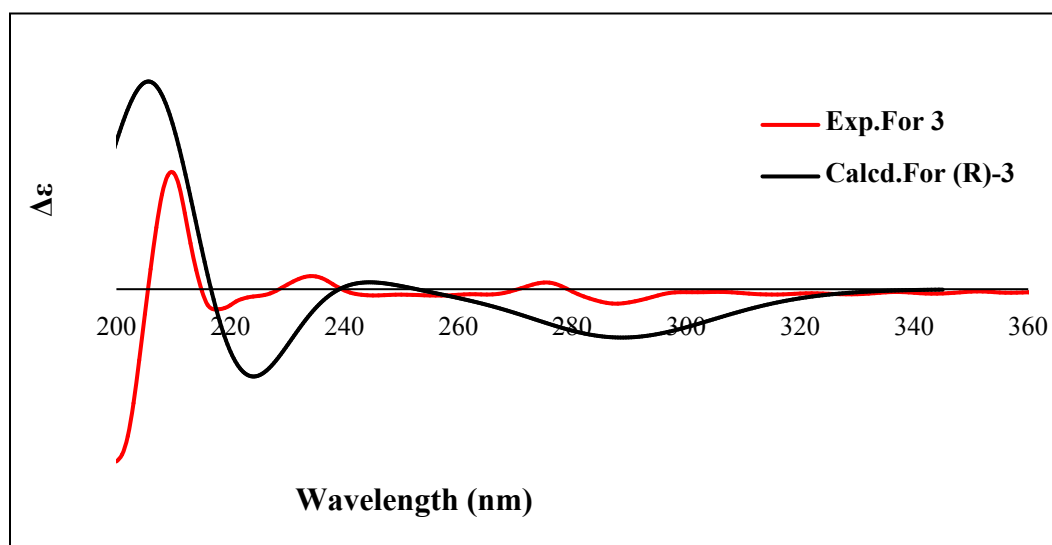

**Figure S30** ECD spectrum of compound **3**

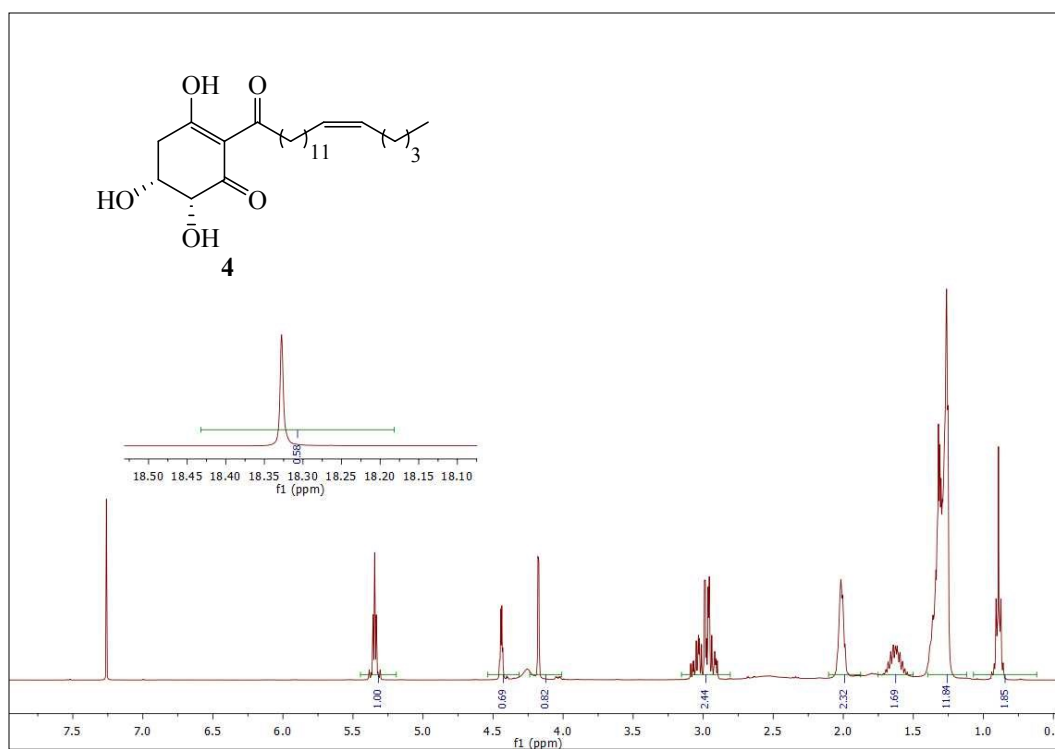

Figure S31 <sup>1</sup>H-NMR spectrum of compound 4

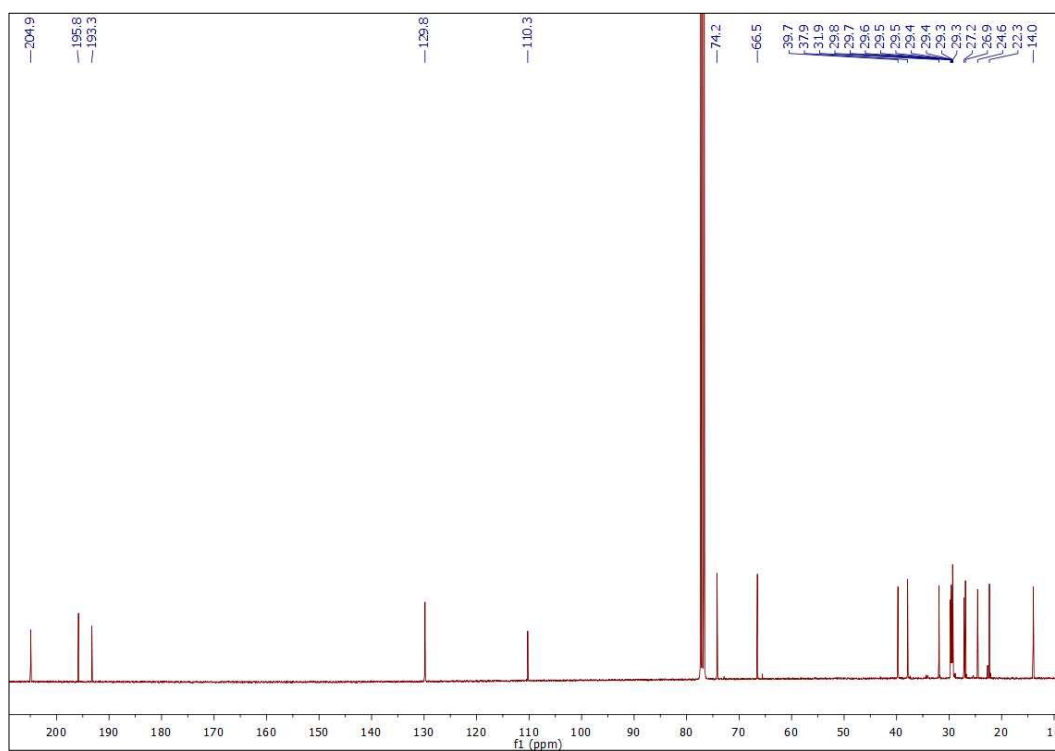

Figure S32 <sup>13</sup>C-NMR spectrum of compound 4

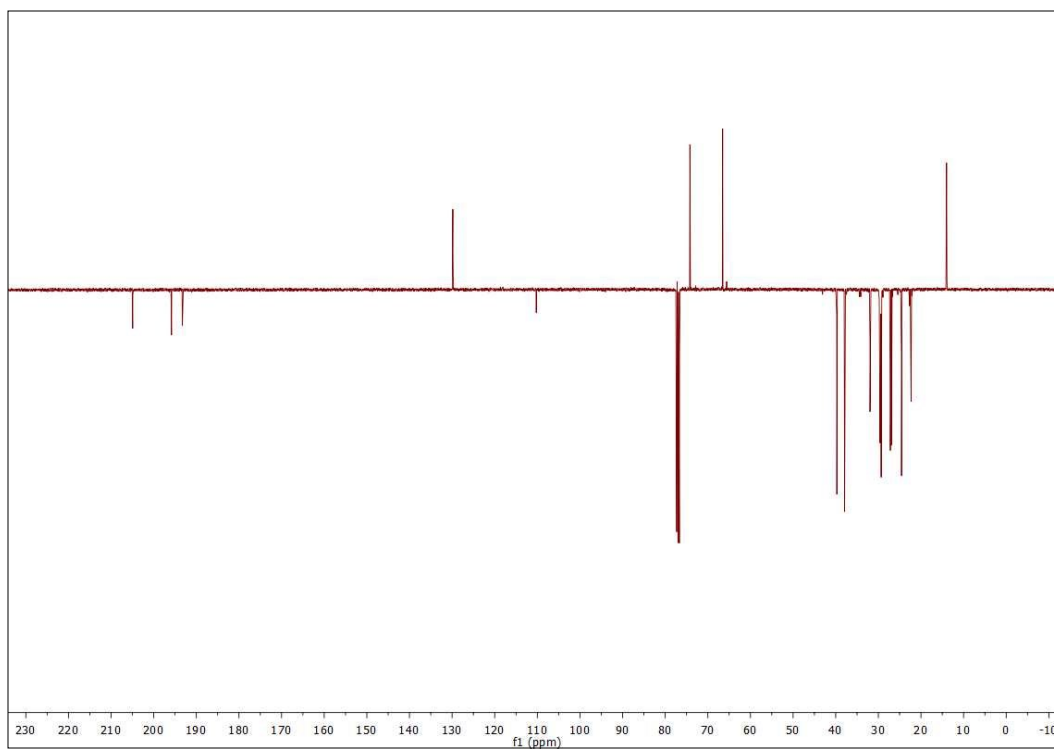

**Figure S33** DEPT spectrum of compound **4**

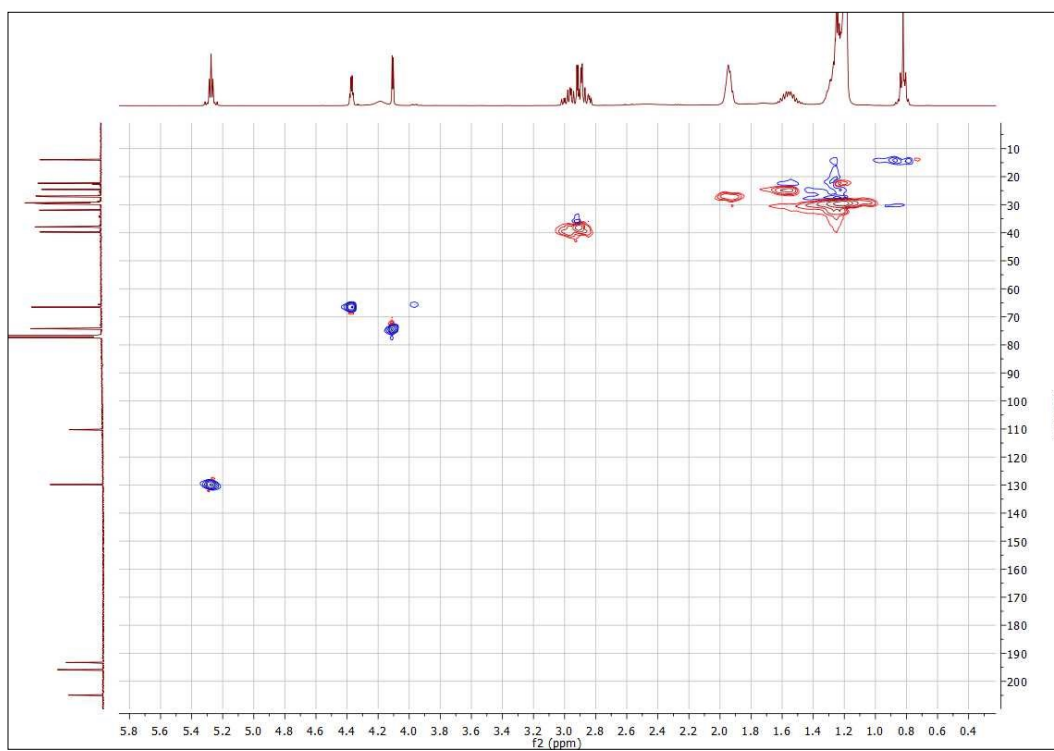

**Figure S34** HMQC spectrum of compound **4**

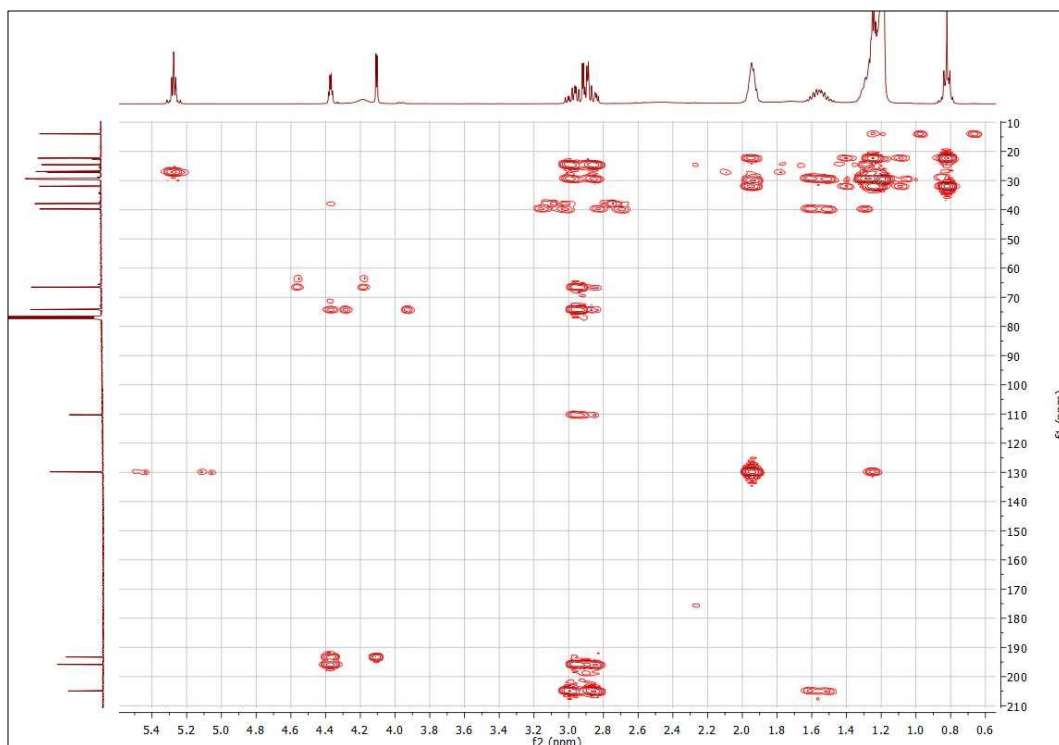

**Figure S35** HMBC spectrum of compound **4**

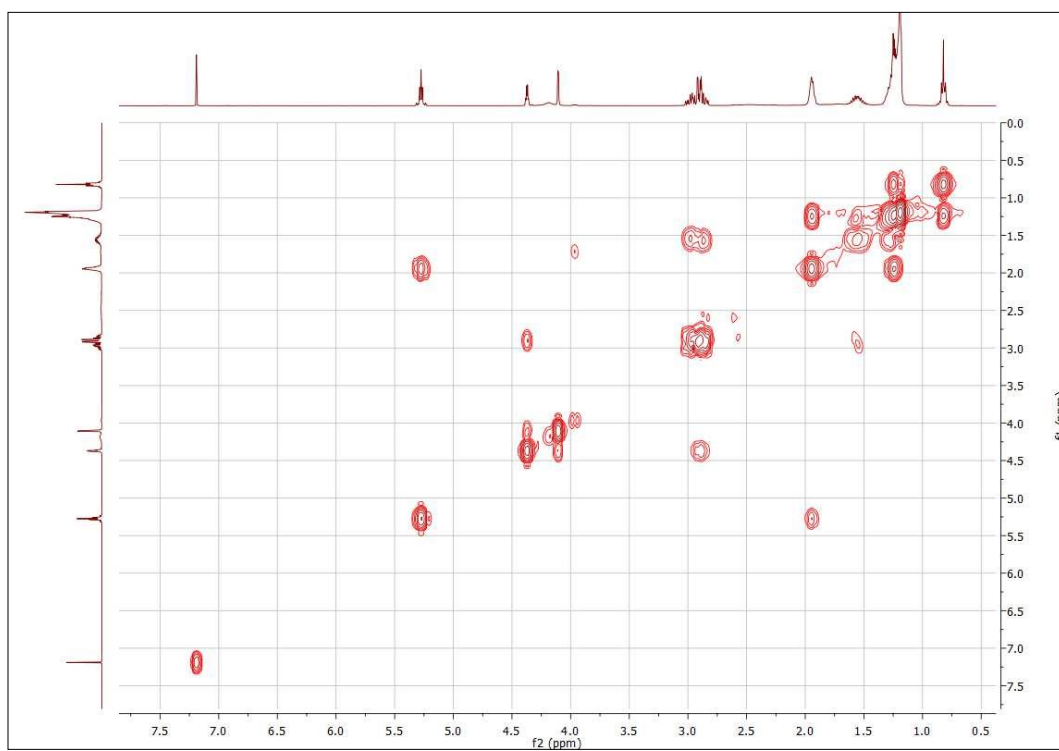

**Figure S36** COSY spectrum of compound **4**

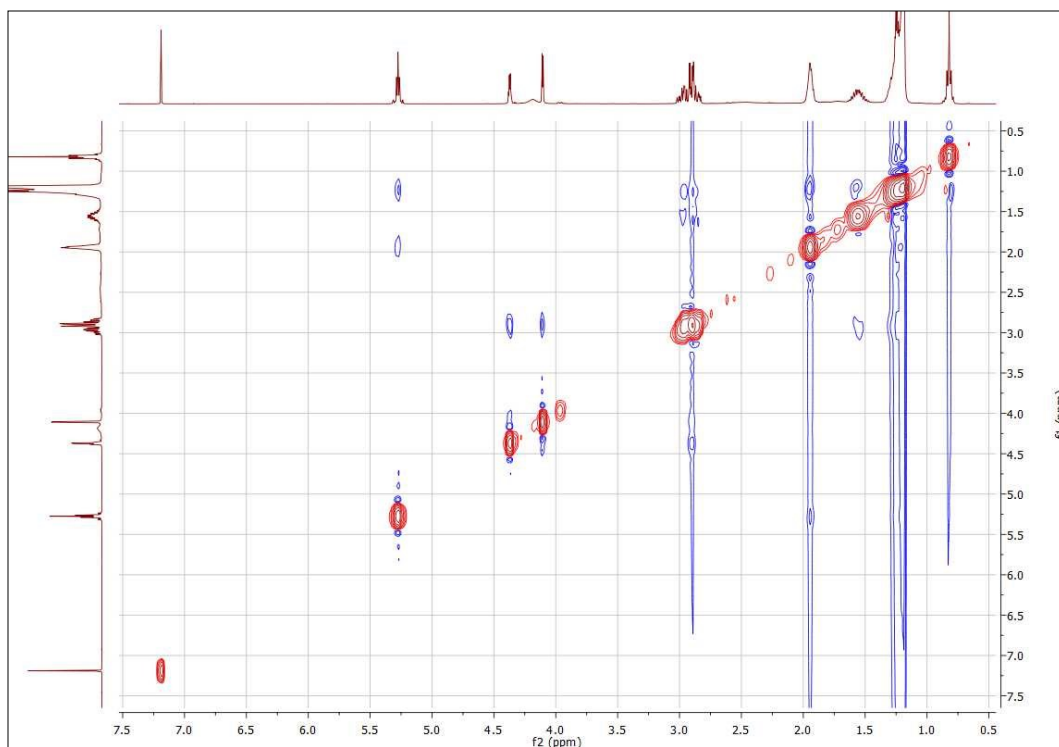

**Figure S37** NOESY spectrum of compound **4**

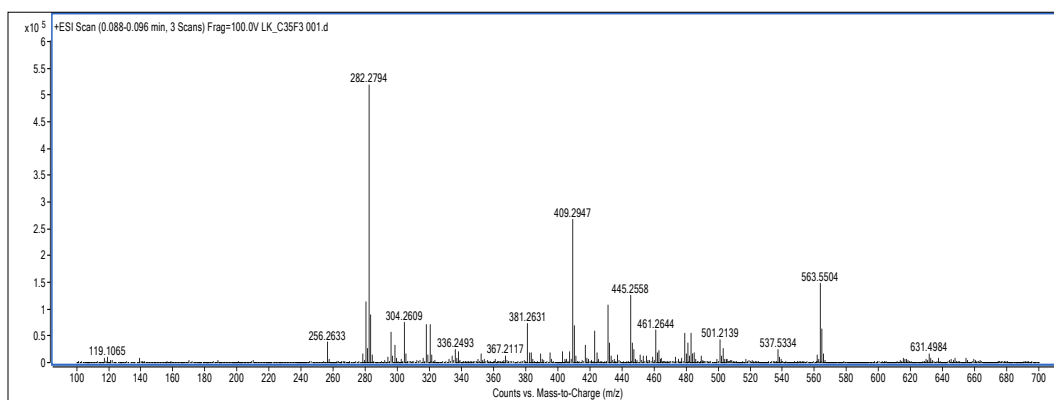

**Figure S38** Mass spectrum of compound **4**

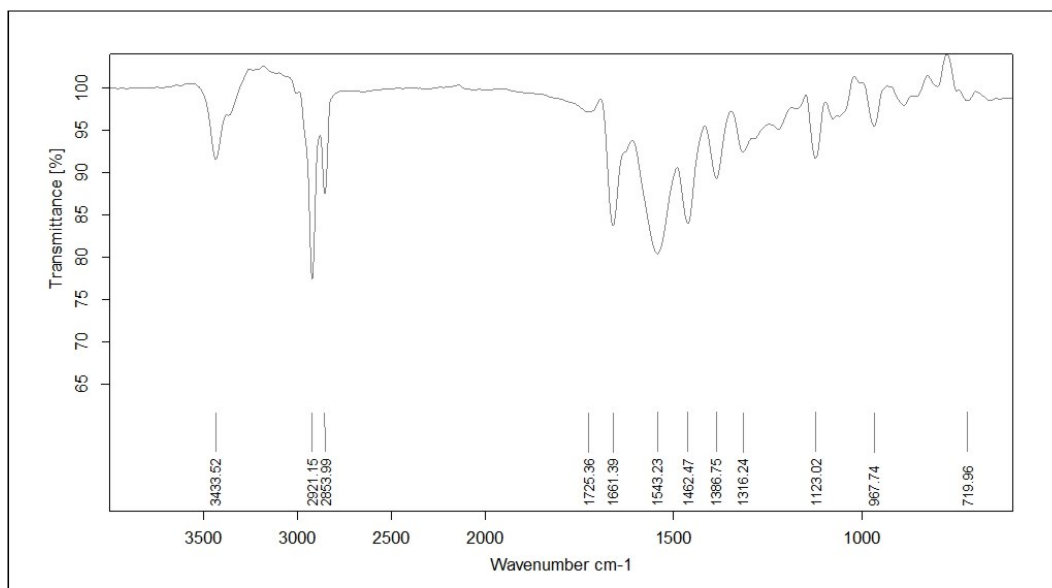

**Figure S39** IR spectrum of compound **4**

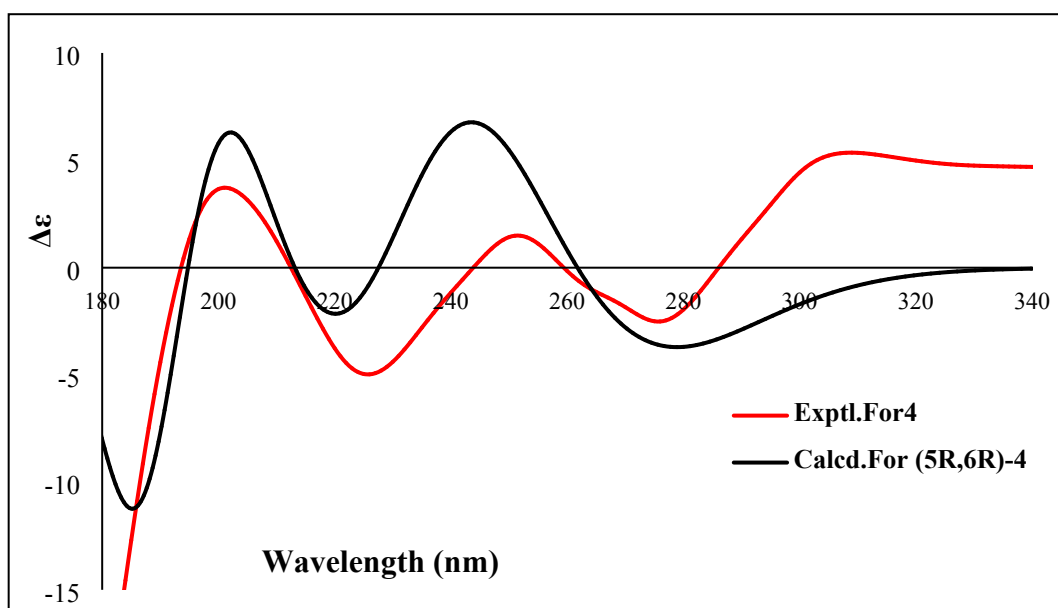

**Figure S40** ECD spectrum of compound **4**

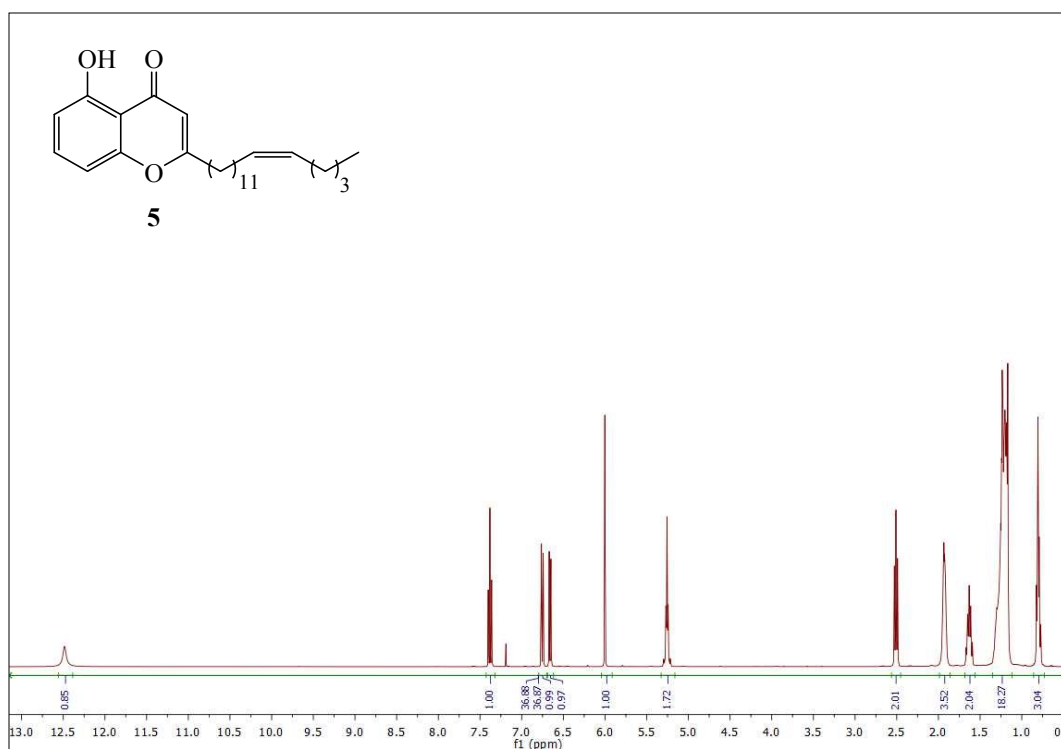

**Figure S41** <sup>1</sup>H-NMR spectrum of compound **5**

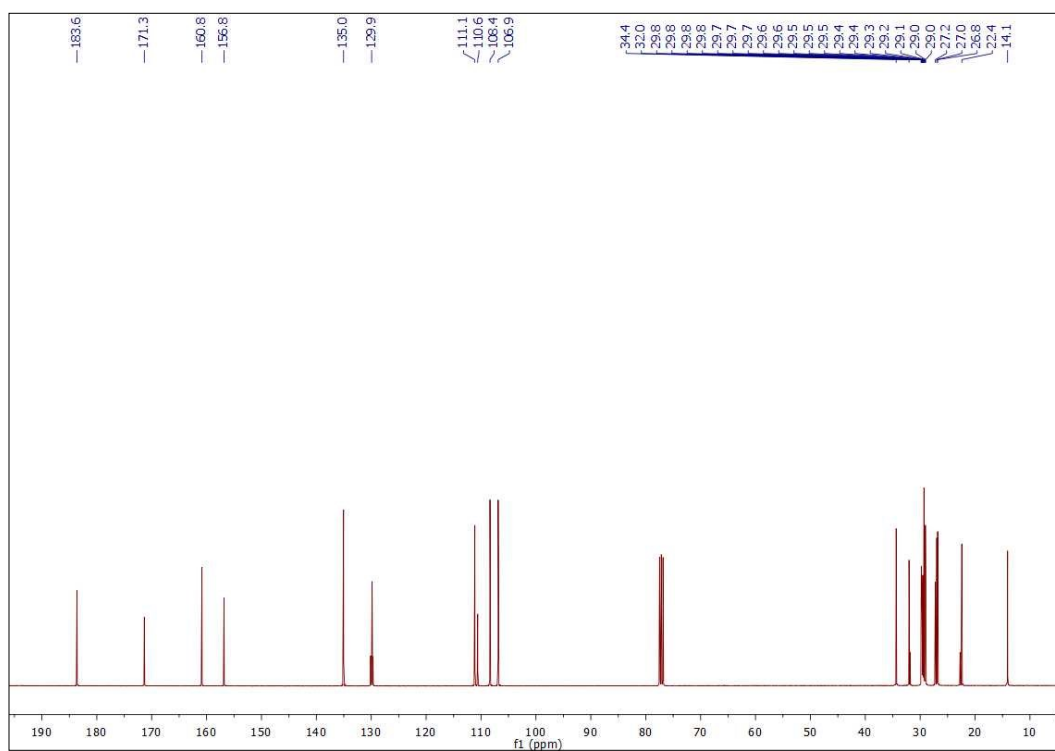

**Figure S42** <sup>13</sup>C-NMR spectrum of compound **5**

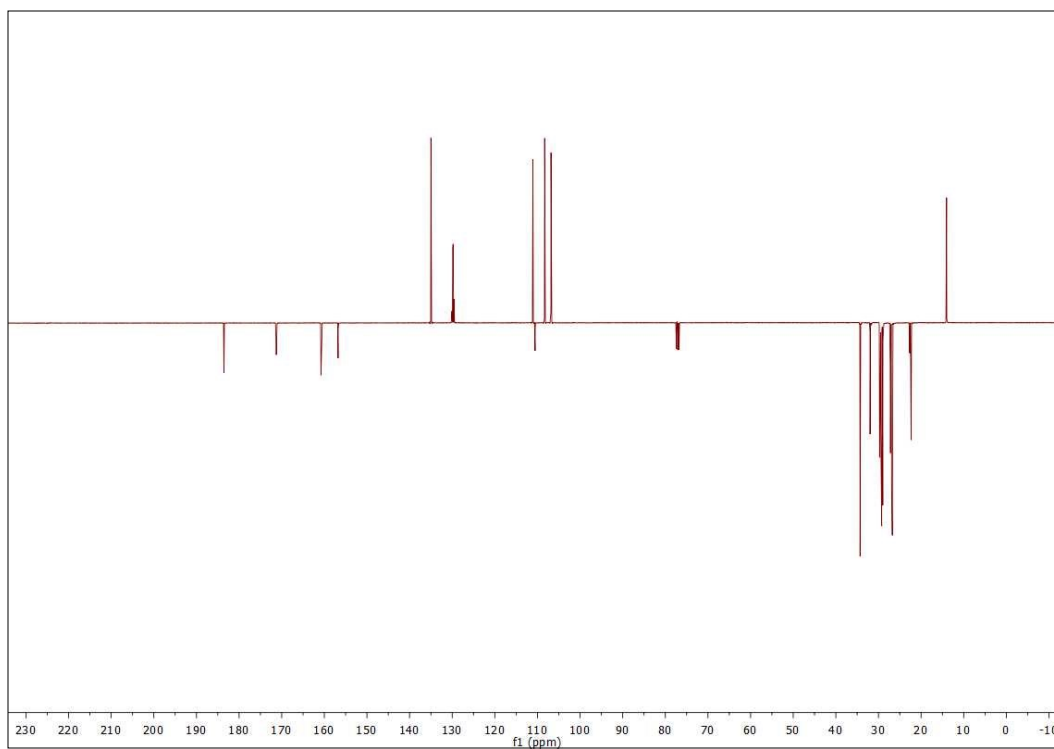

**Figure S43** DEPT spectrum of compound **5**

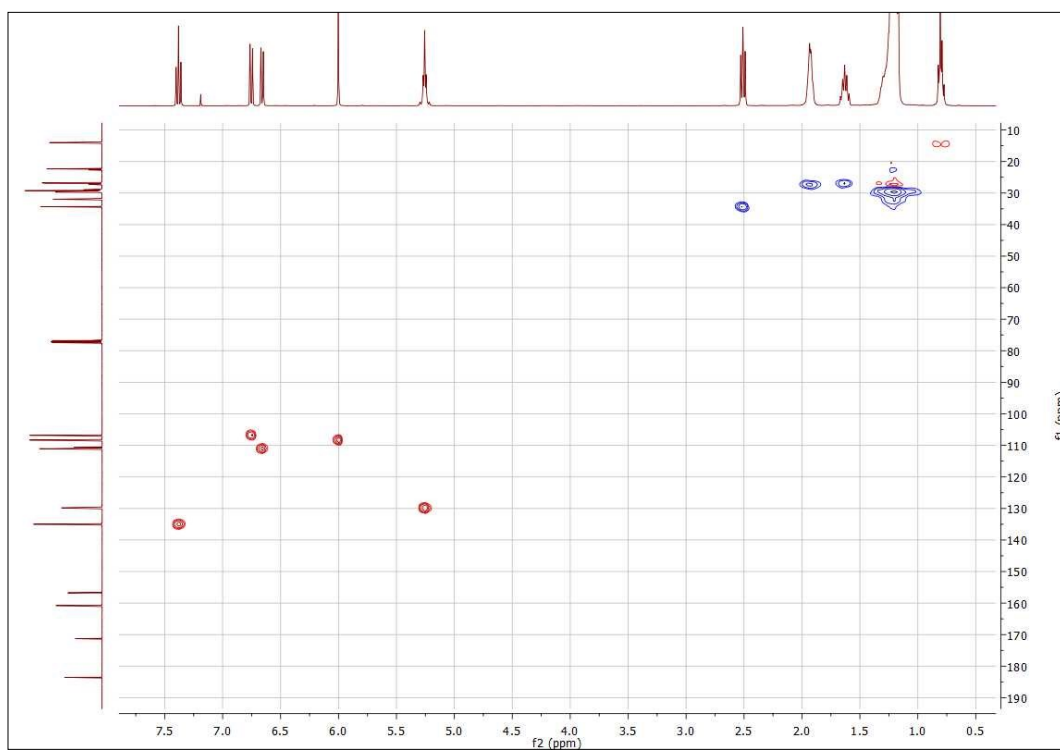

**Figure S44** HMQC spectrum of compound **5**

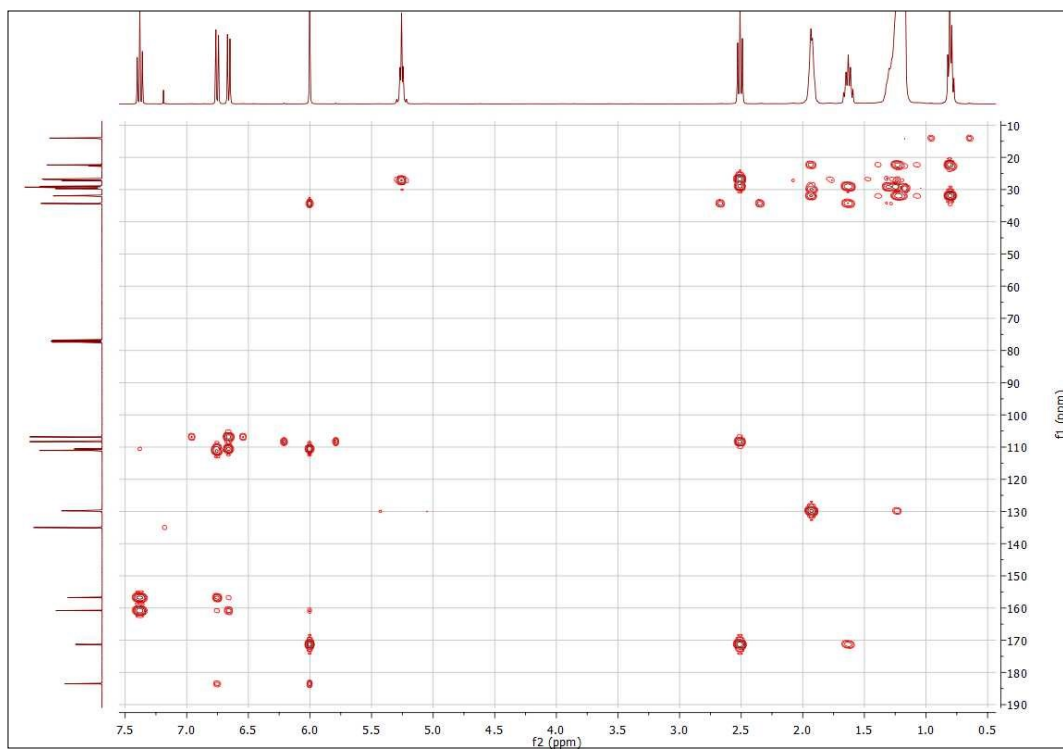

**Figure S45** HMBC spectrum of compound **5**

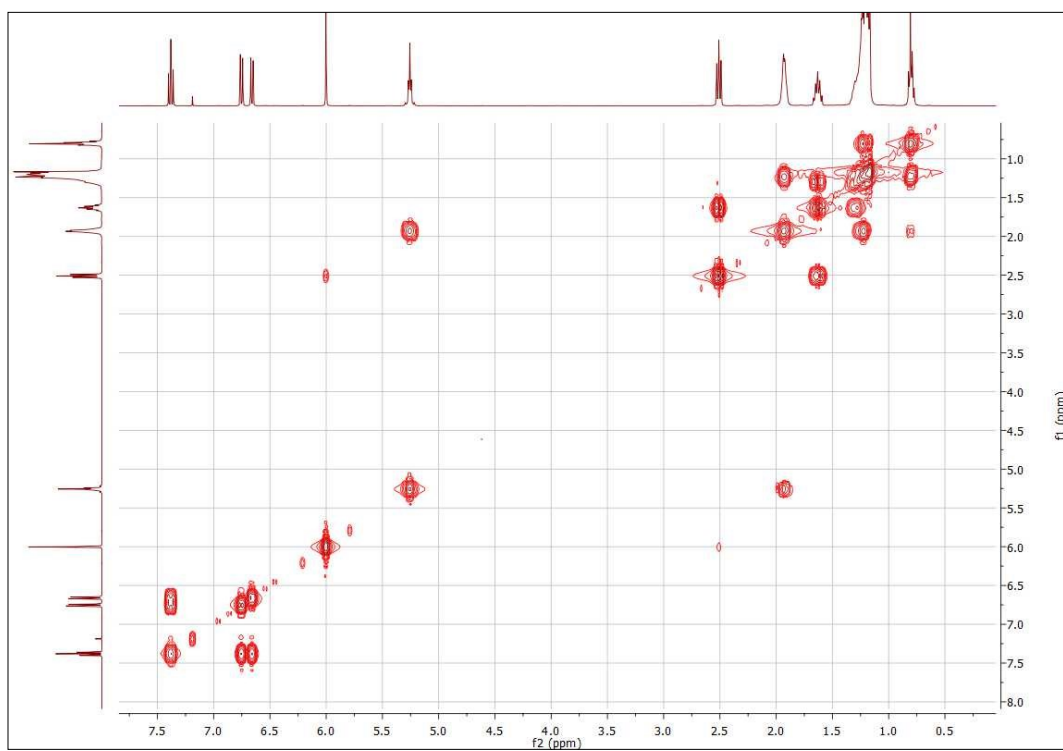

**Figure S46** COSY spectrum of compound **5**

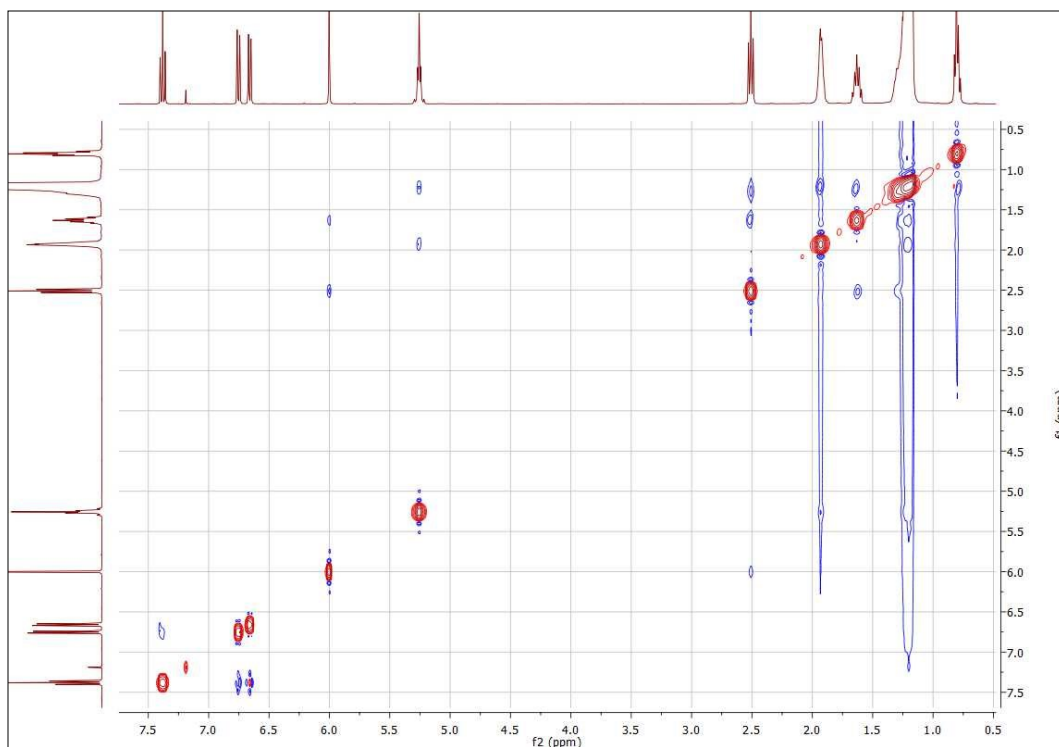

**Figure S47** NOESY spectrum of compound **5**

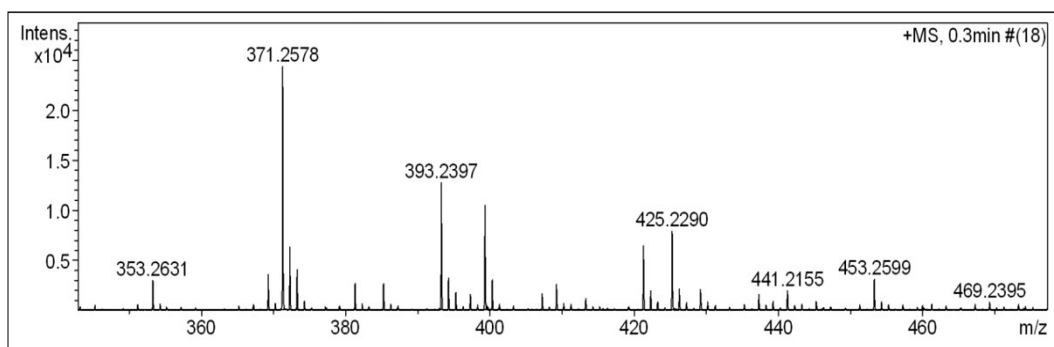

**Figure S48** Mass spectrum of compound **5**

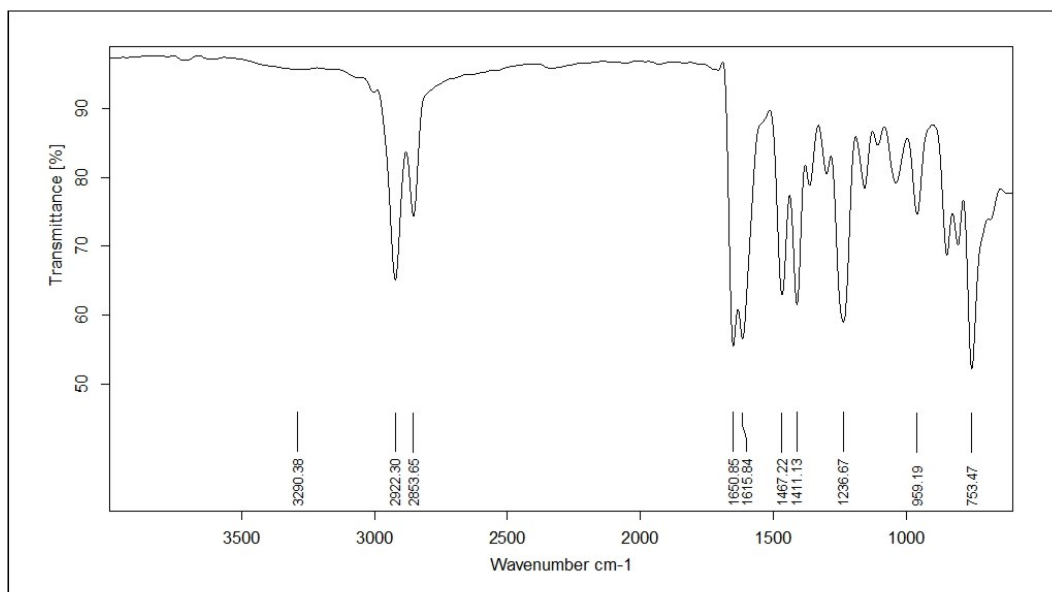

**Figure S49** IR spectrum of compound **5**

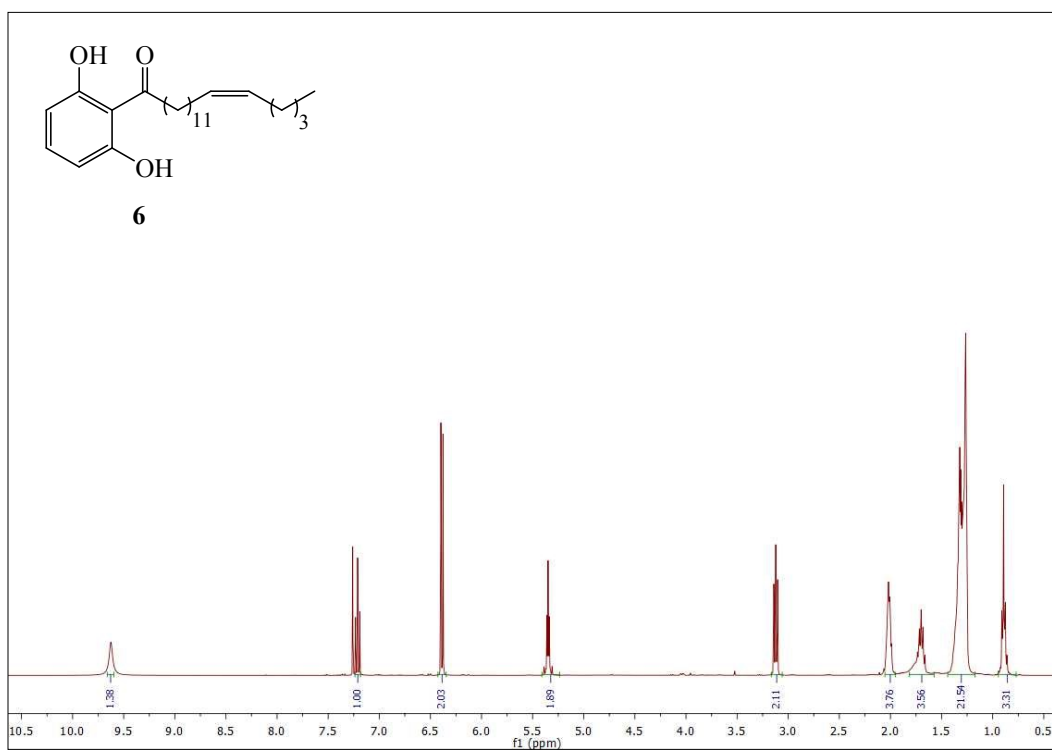

**Figure S50** <sup>1</sup>H-NMR spectrum of compound **6**

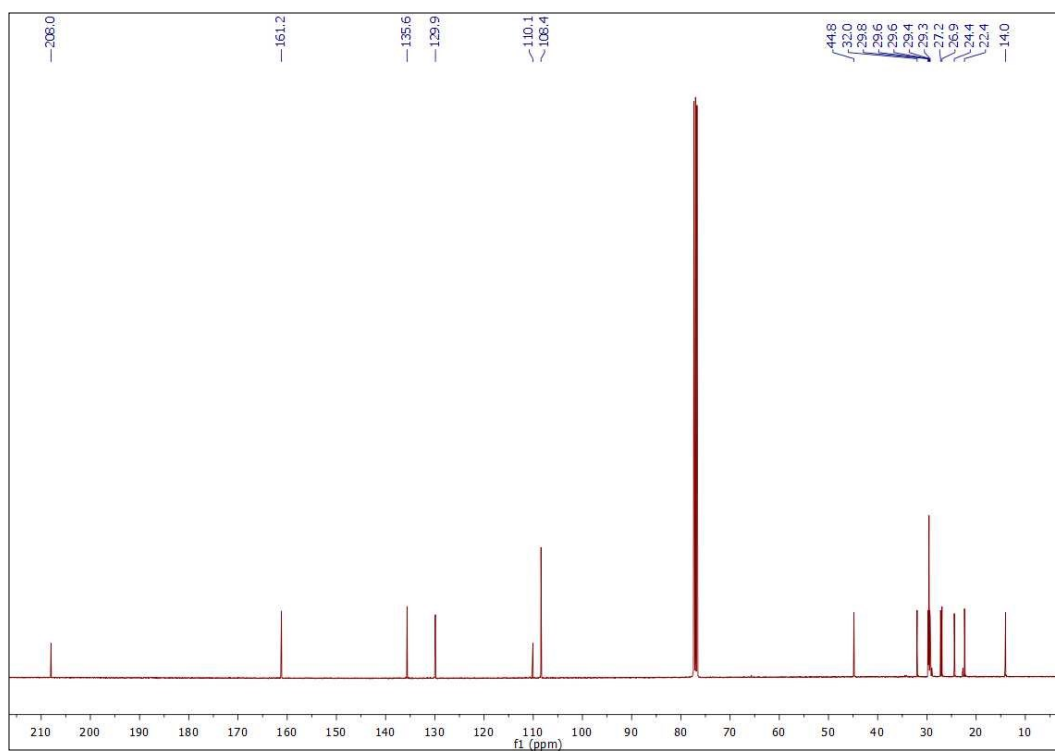

**Figure S51** <sup>13</sup>C-NMR spectrum of compound 6

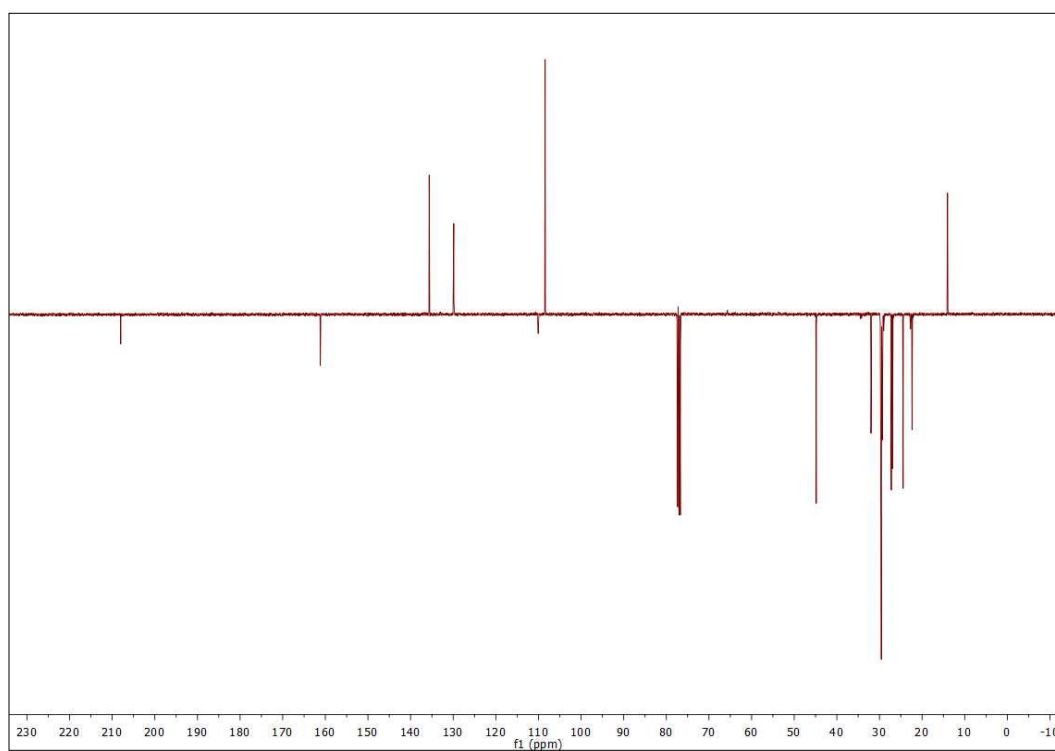

**Figure S52** DEPT spectrum of compound 6

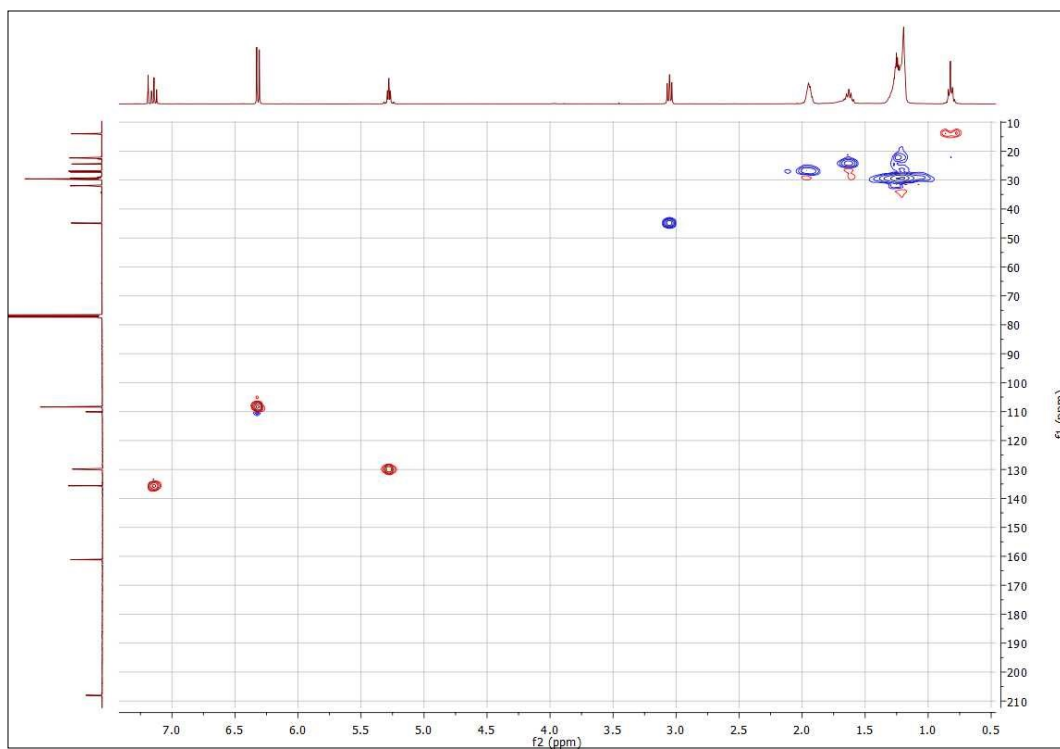

**Figure S53** HMBC spectrum of compound **6**

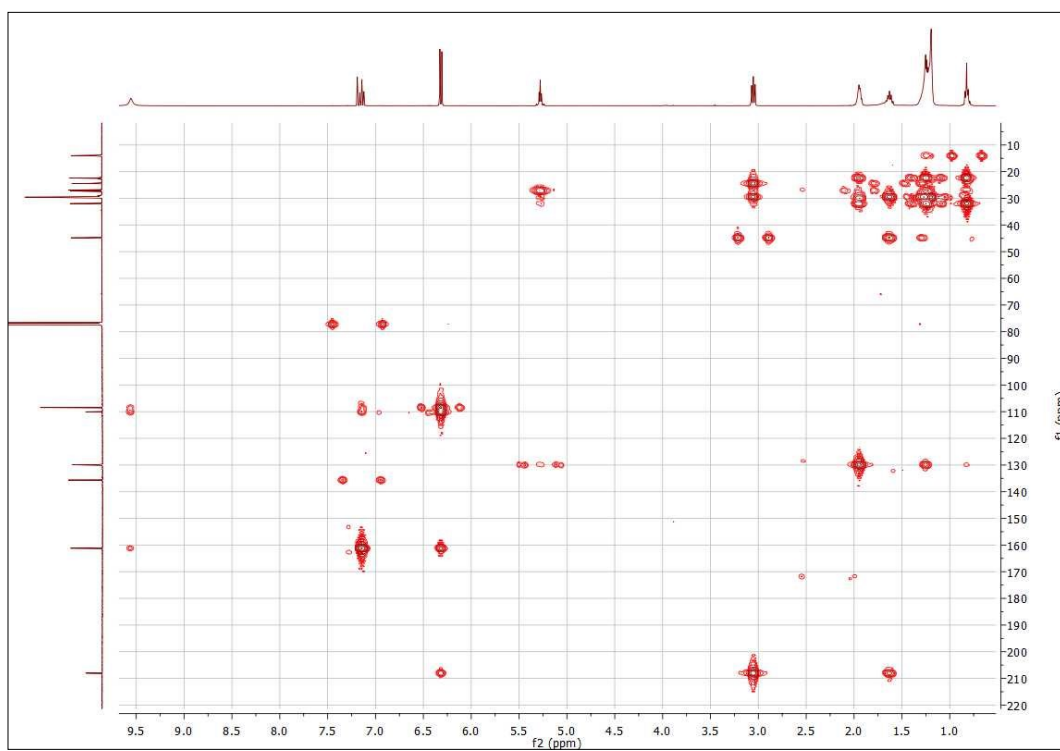

**Figure S54** HMBC spectrum of compound **6**

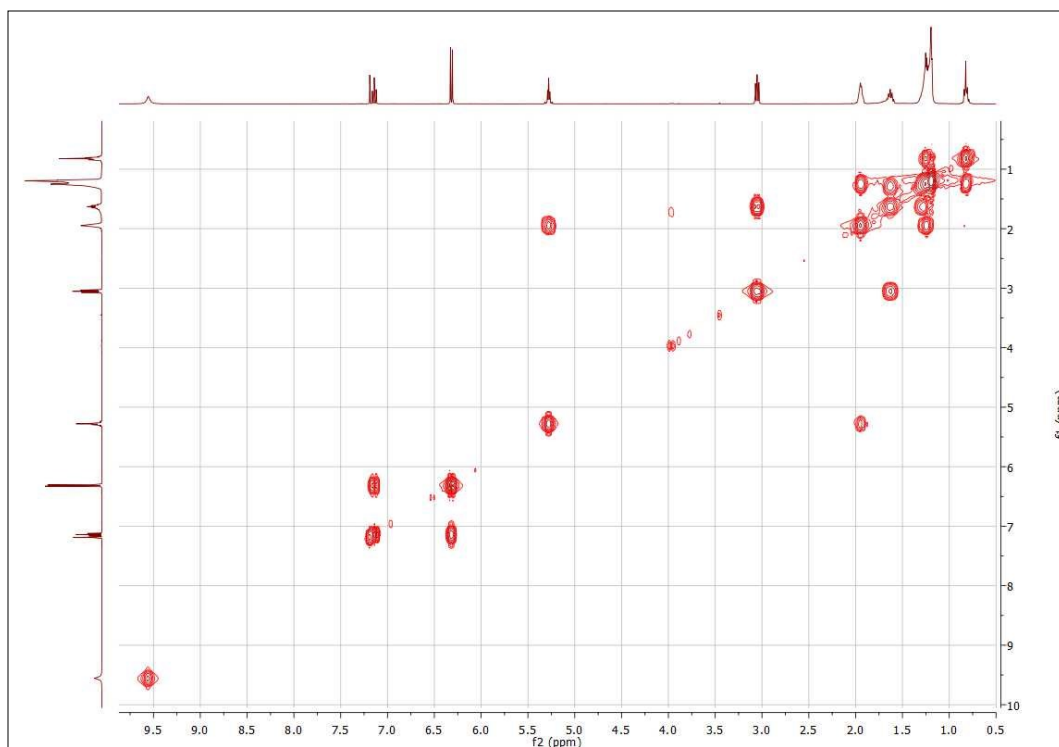

**Figure S55** COSY spectrum of compound **6**

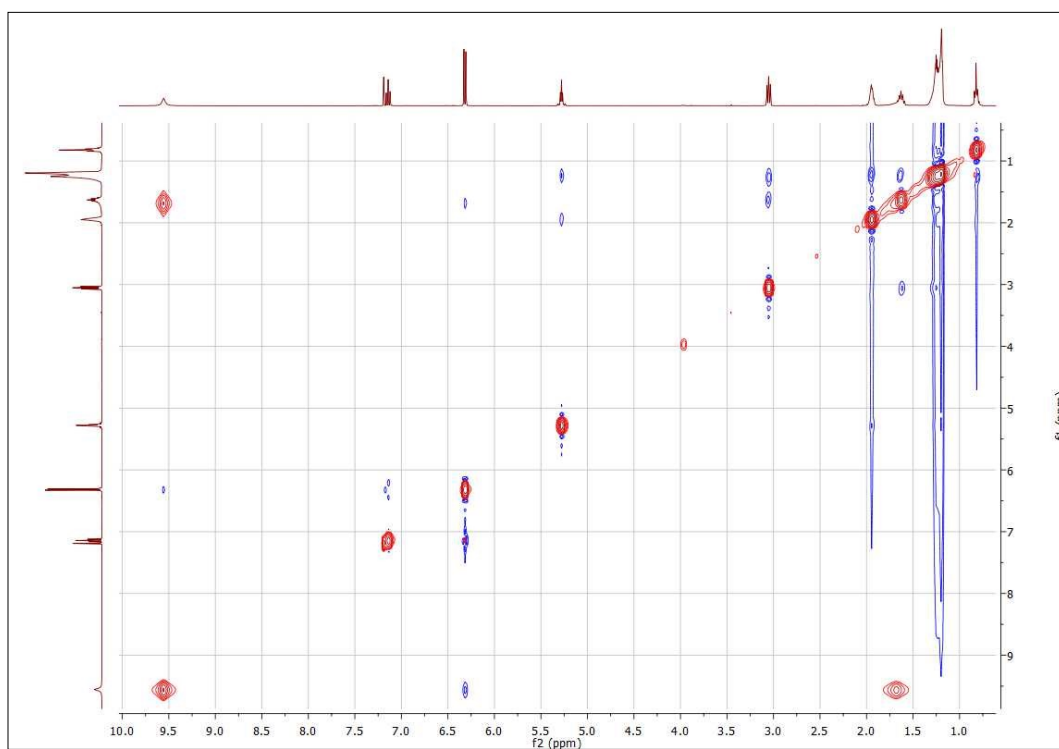

**Figure S56** NOESY spectrum of compound **6**

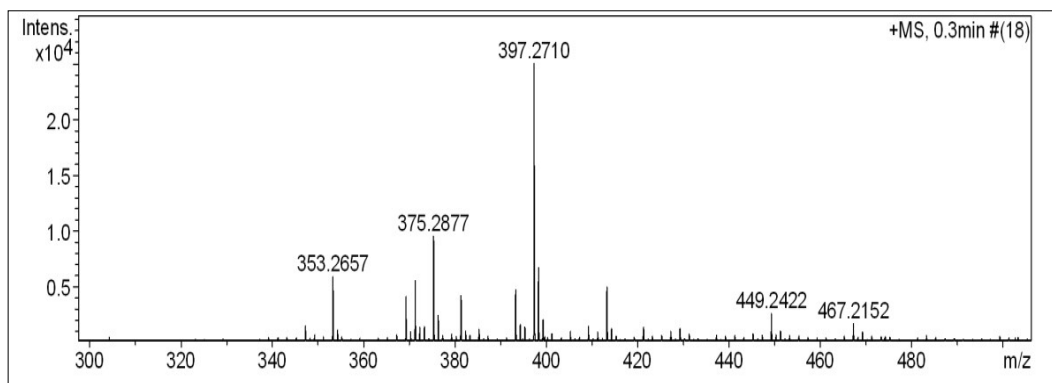

**Figure S57** Mass spectrum of compound **6**

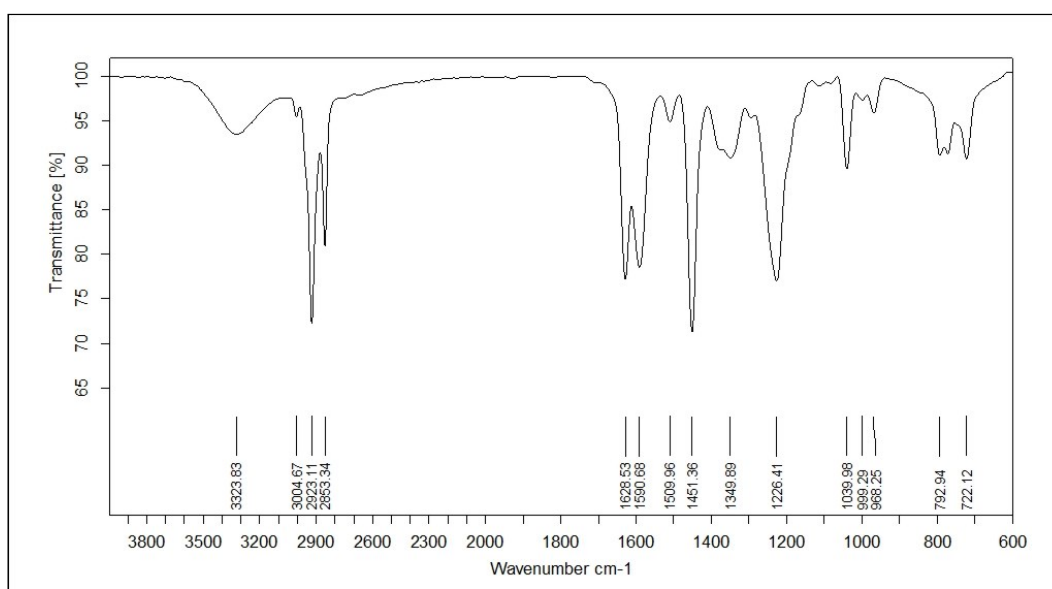

**Figure S58** IR spectrum of compound **6**
